# Supplementary material for: Selenium and bone health: a protocol for a systematic review and meta-analysis
Source: PubMed Central journal article supplement — BMJ Open. 2020 Oct 26;10(10):e036612. doi: 10.1136/bmjopen-2019-036612 (PMC7592280; doi:10.1136/bmjopen-2019-036612), 2020-10-26
Supplement: bmjopen-2019-036612.draft_revisions.pdf [file bmjopen-2019-036612.draft_revisions.pdf]

# BMJ Open

BMJ Open is committed to open peer review. As part of this commitment we make the peer review history of every article we publish publicly available.

When an article is published we post the peer reviewers' comments and the authors' responses online. We also post the versions of the paper that were used during peer review. These are the versions that the peer review comments apply to.

The versions of the paper that follow are the versions that were submitted during the peer review process. They are not the versions of record or the final published versions. They should not be cited or distributed as the published version of this manuscript.

BMJ Open is an open access journal and the full, final, typeset and author-corrected version of record of the manuscript is available on our site with no access controls, subscription charges or pay-per-view fees (<http://bmjopen.bmj.com>).

If you have any questions on BMJ Open's open peer review process please email [info.bmjopen@bmj.com](mailto:info.bmjopen@bmj.com)

# BMJ Open

## Selenium and bone health: a protocol for a systematic review and meta-analysis

|                               |                                                                                                                                                                                                                                                                                                                                                                                                                                                                                                                                                                                                                                                                                                                                                                                                     |
|-------------------------------|-----------------------------------------------------------------------------------------------------------------------------------------------------------------------------------------------------------------------------------------------------------------------------------------------------------------------------------------------------------------------------------------------------------------------------------------------------------------------------------------------------------------------------------------------------------------------------------------------------------------------------------------------------------------------------------------------------------------------------------------------------------------------------------------------------|
| Journal:                      | <i>BMJ Open</i>                                                                                                                                                                                                                                                                                                                                                                                                                                                                                                                                                                                                                                                                                                                                                                                     |
| Manuscript ID                 | bmjopen-2019-036612                                                                                                                                                                                                                                                                                                                                                                                                                                                                                                                                                                                                                                                                                                                                                                                 |
| Article Type:                 | Protocol                                                                                                                                                                                                                                                                                                                                                                                                                                                                                                                                                                                                                                                                                                                                                                                            |
| Date Submitted by the Author: | 21-Dec-2019                                                                                                                                                                                                                                                                                                                                                                                                                                                                                                                                                                                                                                                                                                                                                                                         |
| Complete List of Authors:     | <p>Wang, Ning; Xiangya Hospital Central South University, Department of Orthopaedics<br/> Xie, Dongxing; Xiangya Hospital Central South University, Department of Orthopaedics<br/> Wu, Jing; Central South University Xiangya School of Public Health, Department of Epidemiology and Health Statistics<br/> Wu, Ziyang; Xiangya Hospital Central South University, Department of Orthopaedics<br/> he, hongyi; Xiangya Hospital Central South University, Department of Orthopaedics<br/> Yang, Zidan; Central South University Xiangya School of Public Health, Department of Epidemiology and Health Statistics<br/> Yang, Tuo; Xiangya Hospital Central South University, Health Management Center<br/> Wang, Yilun; Xiangya Hospital Central South University, Department of Orthopaedics</p> |
| Keywords:                     | Bone diseases < ORTHOPAEDIC & TRAUMA SURGERY, PUBLIC HEALTH, Orthopaedic & trauma surgery < SURGERY                                                                                                                                                                                                                                                                                                                                                                                                                                                                                                                                                                                                                                                                                                 |
|                               |                                                                                                                                                                                                                                                                                                                                                                                                                                                                                                                                                                                                                                                                                                                                                                                                     |

SCHOLARONE™  
Manuscripts

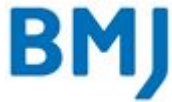

I, the Submitting Author has the right to grant and does grant on behalf of all authors of the Work (as defined in the below author licence), an exclusive licence and/or a non-exclusive licence for contributions from authors who are: i) UK Crown employees; ii) where BMJ has agreed a CC-BY licence shall apply, and/or iii) in accordance with the terms applicable for US Federal Government officers or employees acting as part of their official duties; on a worldwide, perpetual, irrevocable, royalty-free basis to BMJ Publishing Group Ltd ("BMJ") its licensees and where the relevant Journal is co-owned by BMJ to the co-owners of the Journal, to publish the Work in this journal and any other BMJ products and to exploit all rights, as set out in our [licence](#).

The Submitting Author accepts and understands that any supply made under these terms is made by BMJ to the Submitting Author unless you are acting as an employee on behalf of your employer or a postgraduate student of an affiliated institution which is paying any applicable article publishing charge ("APC") for Open Access articles. Where the Submitting Author wishes to make the Work available on an Open Access basis (and intends to pay the relevant APC), the terms of reuse of such Open Access shall be governed by a Creative Commons licence – details of these licences and which [Creative Commons](#) licence will apply to this Work are set out in our licence referred to above.

Other than as permitted in any relevant BMJ Author's Self Archiving Policies, I confirm this Work has not been accepted for publication elsewhere, is not being considered for publication elsewhere and does not duplicate material already published. I confirm all authors consent to publication of this Work and authorise the granting of this licence.

1  
2  
3  
4 **Title: Selenium and bone health: a protocol for a systematic review and meta-**  
5  
6 **analysis**  
7  
8  
9

10  
11 **Authors:** Ning Wang<sup>1\*</sup>, Dongxing Xie<sup>1\*</sup>, Jing Wu<sup>2</sup>, Ziyang Wu<sup>1</sup>, Hongyi He<sup>1</sup>, Zidan  
12  
13  
14 Yang<sup>2</sup>, Tuo Yang<sup>3</sup>, Yilun Wang<sup>1</sup>  
15  
16

17  
18  
19 **Authors' affiliations:**  
20

21  
22 <sup>1</sup>Department of Orthopaedics, Xiangya Hospital, Central South University, Changsha,  
23  
24 Hunan, China  
25

26  
27 <sup>2</sup>Department of Epidemiology and Health Statistics, Xiangya School of Public Health,  
28  
29 Central South University, Changsha, Hunan, China  
30

31  
32 <sup>3</sup>Health Management Center, Xiangya Hospital, Central South University, Changsha,  
33  
34 Hunan, China  
35  
36

37  
38  
39  
40 **Abbreviated title:** Selenium and Bone Health  
41

42  
43  
44  
45 **Keywords:** Selenium, Osteoporosis, Serum, Dietary, Meta-analysis  
46  
47

48  
49  
50 **Word count:** 1719  
51

52  
53  
54  
55 **Email address for all authors:**  
56

57  
58 Ning Wang, NingWang0405@csu.edu.cn  
59  
60

1  
2  
3  
4 Dongxing Xie, xdx1024@csu.edu.cn  
5

6  
7 Jing Wu, janice@csu.edu.cn  
8

9  
10 Ziyang Wu, wuziyang@csu.edu.cn  
11

12  
13 Hongyi He, hongyi\_He@csu.edu.cn  
14

15  
16 Zidan Yang, yzd0902@csu.edu.cn  
17

18  
19 Tuo Yang, yangtuo@csu.edu.cn  
20

21  
22 Yilun Wang, yilun\_wang@csu.edu.cn  
23  
24

25 \*Ning Wang and Dongxing Xie contributed equally to this article.  
26  
27  
28  
29

30 **Correspondence to: Yilun Wang**, Department of Orthopaedics, Xiangya Hospital,  
31  
32 Central South University, Changsha, Hunan, China, E-mail: yilun\_Wang@csu.edu.cn.  
33  
34  
35  
36  
37  
38  
39  
40  
41  
42  
43  
44  
45  
46  
47  
48  
49  
50  
51  
52  
53  
54  
55  
56  
57  
58  
59  
60

## ABSTRACT

**Introduction** Bone health affects the ability of human body to stay active and the degradation of bone health can cause considerable morbidity and mortality. The factors related to bone health play an important role in preventing osteoporosis and its adverse consequences. However, the aetiology of osteoporosis has not been fully elucidated. The deficiency of the trace element selenium may be one of the risk factors for the development of osteoporosis. Previous studies have investigated the effects of selenium on osteoporosis; however, the results are inconclusive. Therefore, the present study aimed to systematically examine the existing literature on the associations between dietary or serum selenium and bone mineral density (BMD), osteoporosis, or osteoporotic fractures, and to quantify such associations through meta-analysis.

**Methods and analysis** PubMed, Embase and Cochrane Library will be searched by applying the specified search strategy to identify relevant studies up to October 2019. The outcomes will include BMD and the prevalence or incidence of osteoporosis and osteoporotic fractures. For the dietary or serum selenium and BMD, osteoporosis, or osteoporotic fractures pooled analyses, estimates will be expressed as the mean difference, and the pooled odds ratio, relative risk, hazard ratio or beta coefficient and corresponding 95% confidence intervals. The heterogeneity of the studies and the publication bias will be investigated accordingly. To assess the quality and the risk of bias of the included studies, the Newcastle-Ottawa Scale or the Cochrane risk of bias assessment tool will be used where appropriate.

1  
2  
3  
4 **Ethics and dissemination** Since no private and confidential patient data will be  
5  
6 contained in the reporting, approval from an ethics committee is not required. The  
7  
8 results will be published in a peer-reviewed journal. The study raises no ethical issues.  
9  
10

11 **PROSPERO registration number** CRD42019147188  
12  
13  
14  
15  
16  
17  
18  
19  
20  
21  
22  
23  
24  
25  
26  
27  
28  
29  
30  
31  
32  
33  
34  
35  
36  
37  
38  
39  
40  
41  
42  
43  
44  
45  
46  
47  
48  
49  
50  
51  
52  
53  
54  
55  
56  
57  
58  
59  
60

For peer review only

### Strengths and limitations of the study

- ▶ As the first meta-analysis that evaluated the associations between dietary selenium intake or serum selenium concentrations and BMD, osteoporosis, or osteoporotic fractures, the findings of this study will deepen the existing knowledge base on the pathogenesis of osteoporosis, and promote the development of effective preventive or treatment strategies.
- ▶ Two investigators will perform the study selection, data extraction and quality assessments independently, and disagreements will be resolved by discussions.
- ▶ Both the quality and the risk of bias will be properly assessed for the included studies by applying the Newcastle-Ottawa Quality Scale or the Cochrane risk of bias assessment tool where appropriate.
- ▶ The differences in study design and sample characteristics may lead to a high level of heterogeneity.



## INTRODUCTION

Bone health affects the ability of human body to stay active throughout life, and the degradation of bone health can cause considerable morbidity and mortality.<sup>1 2</sup> The various factors related to bone health at different ages play an important role in preventing osteoporosis and its adverse consequences.<sup>3</sup> Osteoporosis, which is characterized by low bone mass and microarchitectural deterioration of bone tissue, is a systemic skeletal disease that can result in increased bone fragility and increased fracture risk as a consequence.<sup>3 4</sup> With an ageing population, the socioeconomic and medical impact of osteoporosis will increase rapidly. It is estimated that by 2020, there will be over 200 million people worldwide affected by osteoporosis, and the expenses related to osteoporosis will rise to about \$25.3 billion by 2025.<sup>5</sup> Osteoporosis is practically diagnosed by the presence of a fragility fracture or low bone mineral density (BMD) which is a commonly used proxy measure what accounts for approximately 70% of bone strength.<sup>3</sup> However, osteoporosis can occur without a known underlying cause, and its aetiology has not been fully elucidated.

Nutrition has a significant influence on bone health and nutritional support is among the crucial cornerstones of the prevention of osteoporosis.<sup>6</sup> The trace element selenium, as a critical constituent of about 25 selenoenzymes, plays an essential role in a variety of physiological processes and it has been confirmed that the beneficial effects of selenium are related to human health.<sup>7 8</sup> Some studies collectively suggested that the preservation of selenoproteins in bone was essential to normal skeletal

1  
2  
3  
4 development.<sup>9</sup> Animal studies have shown that selenium-deprivation can retard  
5  
6 growth and change bone metabolism.<sup>10</sup> Such effects are associated with reduced  
7  
8 BMD, impaired bone microarchitecture and increased bone resorption. Previous  
9  
10 clinical studies have investigated the effects of selenium on bone health, however, the  
11  
12 results are inconclusive. Some suggested that serum and dietary selenium were  
13  
14 positively correlated with BMD,<sup>11 12</sup> while other showed that neither serum nor  
15  
16 dietary selenium was associated with osteoporosis.<sup>13 14</sup> Meanwhile, some case-control  
17  
18 studies revealed that the dietary intake of selenium was associated with reduced risk  
19  
20 of osteoporotic hip fracture.<sup>15 16</sup>  
21  
22  
23  
24  
25  
26  
27  
28  
29

30 Meta-analysis is an effective tool for revealing trends that may not be apparent,  
31  
32 and it also helps in establishing clinical policies and guidelines. Thus, we aimed to  
33  
34 systematically examine the existing literature on the associations between dietary or  
35  
36 serum selenium concentrations and BMD, osteoporosis, or osteoporotic fractures, and  
37  
38 to quantify such associations through meta-analysis where feasible.  
39  
40  
41  
42  
43  
44

## 45 **METHODS**

### 46 **Study design**

47  
48 The aim of this meta-analysis is to investigate the associations between dietary intake  
49  
50 or serum levels of selenium and BMD, osteoporosis, or osteoporotic fractures. This  
51  
52 protocol was developed according to the Preferred Reporting Items for Systematic  
53  
54 Review and Meta-Analyses Protocols (PRISMA-P) 2015 Statement,<sup>17</sup> and has been  
55  
56  
57  
58  
59  
60

1  
2  
3  
4 registered in the international prospective register of systematic reviews PROSPERO  
5  
6 network (registration number: CRD42019147188).  
7  
8  
9

## 10 11 **Eligibility criteria**

### 12 13 14 Types of studies

15  
16 The meta-analysis will include both interventional and observational studies, inclusive  
17  
18 of case-control studies, randomized controlled trials, cross-sectional studies and  
19  
20 cohort studies which focus on the associations between dietary intake or serum levels  
21  
22 of selenium and BMD, osteoporosis, or osteoporotic fractures.  
23  
24  
25  
26  
27  
28  
29

### 30 31 Types of participants

32  
33 The participants in the included studies must be with information on dietary intake or  
34  
35 serum levels of selenium, and with data of BMD or diagnosis of osteoporosis or  
36  
37 osteoporotic fractures. No sex, ethnicity, economic status, geographical limitations, or  
38  
39 education restrictions will be applied.  
40  
41  
42  
43  
44  
45  
46  
47

### 48 49 Types of exposure/intervention

50  
51 Two main forms of exposure will be included, i.e., dietary intake selenium and serum  
52  
53 levels of selenium.  
54  
55

### 56 57 Types of outcome measures

58  
59 Primary outcomes will include BMD values and the prevalence or incidence of  
60

1  
2  
3  
4 osteoporosis. The secondary outcome will be the prevalence or incidence of  
5  
6 osteoporotic fractures. There will be no restriction on site and measuring method.  
7  
8  
9

### 10 11 **Information sources**

12  
13 Systematic literature searches will be undertaken across PubMed, Embase and  
14  
15 Cochrane Library by applying the specified search strategy to identify relevant studies  
16  
17 up to October 2019 on each platform or database. In addition, the references of the  
18  
19 retrieved literature will be manually searched, and the relevant studies and systematic  
20  
21 reviews will be scanned for additional eligible studies.  
22  
23  
24  
25  
26  
27  
28  
29

### 30 **Search strategy**

31  
32 Keyword terms or medical subject heading terms (MESH) will be used to search for  
33  
34 eligible studies in the databases mentioned above. The electronic search strategy is  
35  
36 presented in **Table 1**. All the search terms will be adapted for different syntax rules of  
37  
38 the databases.  
39  
40  
41  
42  
43  
44  
45

### 46 **Study selection**

47  
48 The search results from the three electronic databases will be sent to Endnote. After  
49  
50 removing duplicates, two investigators will be responsible for screening the titles and  
51  
52 abstracts of all the retrieved literature to identify eligible studies. In case that the  
53  
54 eligibility of a study cannot be determined, the full text will be reviewed for inclusion  
55  
56 according to prespecified inclusion and exclusion criteria. There will be no restriction  
57  
58  
59  
60

1  
2  
3  
4 on the publication date and language. The study selection process will be summarized  
5  
6 based on the PRISMA flow diagram. Disagreements between the two investigators  
7  
8 will be resolved by discussing with a third investigator.  
9  
10

### 11 12 13 14 **Data extraction**

15  
16 Two investigators will be engaged to independently extract the following data in a  
17  
18 standardized collection form: publication information (author, year of publishing);  
19  
20 study information (country of origin, study setting, data sources, study period);  
21  
22 demographic information (sample size, age, and sex distribution); exposure  
23  
24 information (dietary or serum selenium concentrations); outcome information (BMD,  
25  
26 osteoporosis, osteoporotic fractures). Then, the effect sizes (mean difference [MD],  
27  
28 odds ratio [OR], relative risk [RR], hazard ratio [HR] or beta coefficient [ $\beta$ ]) will be  
29  
30 either extracted directly or calculated based on the information in the original studies  
31  
32 whenever possible. If the relevant data is not reported in an included study, the  
33  
34 missing information will be obtained by contacting the authors directly as far as  
35  
36 possible. The two investigators responsible for reviewing the literature will resolve  
37  
38 any disagreements through discussions, and a third independent investigator may be  
39  
40 involved into the discussion if required.  
41  
42  
43  
44  
45  
46  
47  
48  
49  
50  
51  
52

### 53 **Assessment of risk of bias**

54  
55 The Cochrane risk of bias assessment tool will be used to assess the quality of  
56  
57 RCTs,<sup>18</sup> while the Newcastle-Ottawa Quality Scale (NOS) will be used to assess the  
58  
59  
60

1  
2  
3  
4 quality of observational studies.<sup>19</sup> Two investigators will be engaged to conduct the  
5  
6 risk of bias assessment independently, and disagreements will be resolved through  
7  
8 discussions.  
9

### 10 11 12 13 14 **Data analysis**

15  
16 Firstly, the characteristics of included studies will be summarized using baseline  
17  
18 tables and narrative texts. The proposed study will calculate the MD, the pooled OR,  
19  
20 RR, HR or  $\beta$  and the corresponding 95% CIs. Then, Cochrane's Q test and the  $I^2$   
21  
22 statistics will be used to assess the heterogeneity of the included studies, where  $p$   
23  
24 value  $> 0.05$  of the Q statistics and  $I^2$  value  $< 50\%$  indicate statistical homogeneity. If  
25  
26 the included studies are found to be statistically homogeneous, the fixed effects  
27  
28 models will be used to pool the data during meta-analysis; otherwise, the random  
29  
30 effects models will be used instead. Statistical analyses will be conducted in Review  
31  
32 Manager-5.3 (Copenhagen: The Nordic Cochrane Centre, The Cochrane  
33  
34 Collaboration, 2014) and Stata-11.0 (StataCorp LP, College Station, TX) statistical  
35  
36 software. Statistical significance is considered at  $p$  value  $< 0.05$ .  
37  
38  
39  
40  
41  
42  
43  
44  
45  
46  
47

### 48 **Assessment of publication bias**

49  
50 If the number of included studies is greater than 10, a funnel plot will be constructed  
51  
52 and the Egger test will be conducted to observe the publication bias. The existence of  
53  
54 publication bias is confirmed when the funnel plot shows an asymmetric pattern.  
55  
56 Then, the bias, if any, will be explained through discussions after assessment.  
57  
58  
59  
60

### **Patient and public involvement**

As our systematic review will be implemented based on published studies, no patients and members of the public will be directly involved. All the data to be used in this study already exists in the published literature and/or the aforementioned sources.

### **Ethics and dissemination**

As this meta-analysis will be performed based on published studies, and no private and confidential patient data will be contained in the reporting, approval from an ethics committee is not required. The results will be disseminated through publication in a peer- reviewed journal. The study raises no ethical issues.

## **DISCUSSION**

To our best knowledge, there are at least 10 studies that have investigated the associations between dietary or serum selenium concentrations and BMD, osteoporosis, or osteoporotic fractures. Of them, two studies suggested that serum and dietary selenium were likely to positively correlate with BMD,<sup>11 12</sup> and three studies showed that dietary selenium was negatively associated with osteoporotic fractures.<sup>15</sup><sup>16 20</sup> On the contrary, one study found no association between dietary selenium and BMD,<sup>21</sup> and four studies reported that neither serum nor dietary selenium was related to osteoporosis.<sup>13 14 22 23</sup>

1  
2  
3  
4 The health of the skeletal system is important for elderly people.<sup>1</sup> Nowadays,  
5  
6 osteoporosis is becoming increasingly more prevalent with population aging around  
7  
8 the world, presenting a severe public health problem in the future.<sup>5</sup> Selenium is an  
9  
10 essential element for bones, and plays an important role in skeletal development.<sup>10</sup> An  
11  
12 in-depth understanding of the relationship between selenium and bone health is useful  
13  
14 for designing early life interventions. The sample size of previous studies might have  
15  
16 not always been big enough to achieve sufficient statistical power, which could  
17  
18 explain, at least in part, why the statistical difference in some instances was not  
19  
20 reached, despite the obvious trends. Therefore, the aim of this systematic review and  
21  
22 meta-analysis is to summarize the available evidence to investigate the associations  
23  
24 between selenium and bone health. The results of this study will deepen the existing  
25  
26 knowledge base on the pathogenesis of osteoporosis, and promote the development of  
27  
28 preventive or treatment strategies in this field.  
29  
30  
31  
32  
33  
34  
35  
36  
37  
38  
39  
40  
41  
42  
43  
44  
45  
46  
47  
48  
49  
50  
51  
52  
53  
54  
55  
56  
57  
58  
59  
60



## COMPETING INTERESTS

The authors declare that they have no conflict of interest.

## PATIENT CONSENT FOR PUBLICATION

Not required.

## FUNDING

This work was supported by the National Natural Science Foundation of China (81772413, 81601941, 81702207, 81702206), the National Key Research and Development Program of China (2018YFB1105705), the Scientific Research Project of Science and Technology Office of Hunan Province (2017TP1005), the Key Research and Development Program of Hunan Province (2018SK2070, 2017SK2071), the Young Investigator Grant of Xiangya Hospital, Central South University (2016Q03, 2016Q06, 2017Q10), the Xiangya Clinical Big Data System Construction Project of Central South University (45), and the Natural Science Foundation of Hunan Province (2017JJ3491, 2017JJ3492, 2018JJ3825, 2019JJ50965).

## AUTHOR'S CONTRIBUTIONS

Conceptualization: Yilun Wang and Dongxing Xie

Data curation: Jing Wu, Ziyang Wu, Hongyi He, Zidan Yang

Methodology: Jing Wu, Ziyang Wu, Hongyi He, Zidan Yang

1  
2  
3  
4 Writing – original draft: Ning Wang and Dongxing Xie  
5

6 Writing – review & editing: Yilun Wang and Tuo Yang  
7  
8  
9  
10  
11  
12  
13  
14  
15  
16  
17  
18  
19  
20  
21  
22  
23  
24  
25  
26  
27  
28  
29  
30  
31  
32  
33  
34  
35  
36  
37  
38  
39  
40  
41  
42  
43  
44  
45  
46  
47  
48  
49  
50  
51  
52  
53  
54  
55  
56  
57  
58  
59  
60

For peer review only

## REFERENCES

1. van den Bergh JP, van Geel TA, Geusens PP. Osteoporosis, frailty and fracture: implications for case finding and therapy. *Nat Rev Rheumatol* 2012;8:163-72.
2. Farhat GN, Cauley JA. The link between osteoporosis and cardiovascular disease. *Clin Cases Miner Bone Metab* 2008;5:19-34.
3. Nih Consensus Development Panel on Osteoporosis Prevention D, Therapy. Osteoporosis prevention, diagnosis, and therapy. *JAMA* 2001;285:785-95.
4. Kanis JA. Assessment of fracture risk and its application to screening for postmenopausal osteoporosis: synopsis of a WHO report. WHO Study Group. *Osteoporos Int* 1994;4:368-81.
5. Burge R, Dawson-Hughes B, Solomon DH, *et al.* Incidence and economic burden of osteoporosis-related fractures in the United States, 2005-2025. *J Bone Miner Res* 2007;22:465-75.
6. Chen LR, Hou PH, Chen KH. Nutritional Support and Physical Modalities for People with Osteoporosis: Current Opinion. *Nutrients* 2019;11:e 2848.
7. Whanger PD. Selenium and its relationship to cancer: an update. *Br J Nutr* 2004;91:11-28.
8. Rayman MP. Selenoproteins and human health: insights from epidemiological data. *Biochim Biophys Acta* 2009;1790:1533-40.
9. Zhang Z, Zhang J, Xiao J. Selenoproteins and selenium status in bone physiology and pathology. *Biochim Biophys Acta* 2014;1840:3246-56.
10. Moreno-Reyes R, Egrise D, Neve J, *et al.* Selenium deficiency-induced growth retardation is associated with an impaired bone metabolism and osteopenia. *J Bone Miner Res* 2001;16:1556-63.
11. Beukhof CM, Medici M, van den Beld AW, *et al.* Selenium Status Is Positively Associated with Bone Mineral Density in Healthy Aging European Men. *PLoS One* 2016;11:e0152748.
12. Rivas A, Romero A, Mariscal-Arcas M, *et al.* Association between dietary antioxidant quality score (DAQs) and bone mineral density in Spanish women. *Nutr Hosp* 2012;27:1886-93.
13. Arikan DC, Coskun A, Ozer A, *et al.* Plasma selenium, zinc, copper and lipid levels in postmenopausal Turkish women and their relation with osteoporosis. *Biol Trace Elem Res* 2011;144:407-17.
14. Ilich JZ, Cvijetic S, Baric IC, *et al.* Nutrition and lifestyle in relation to bone health and body weight in Croatian postmenopausal women. *Int J Food Sci Nutr* 2009;60:319-32.
15. Zhang J, Munger RG, West NA, *et al.* Antioxidant intake and risk of osteoporotic hip fracture in Utah: an effect modified by smoking status. *Am J Epidemiol* 2006;163:9-17.
16. Sun LL, Li BL, Xie HL, *et al.* Associations between the dietary intake of antioxidant nutrients and the risk of hip fracture in elderly Chinese: a case-control study. *Br J Nutr* 2014;112:1706-14.
17. Moher D, Shamseer L, Clarke M, *et al.* Preferred reporting items for systematic review and meta-analysis protocols (PRISMA-P) 2015 statement. *Syst Rev* 2015;4:1.
18. Whiting P, Savovic J, Higgins JP, *et al.* ROBIS: A new tool to assess risk of bias in systematic reviews was developed. *J Clin Epidemiol* 2016;69:225-34.
19. Stang A. Critical evaluation of the Newcastle-Ottawa scale for the assessment of the quality of nonrandomized studies in meta-analyses. *Eur J Epidemiol* 2010;25:603-5.
20. Melhus H, Michaelsson K, Holmberg L, *et al.* Smoking, antioxidant vitamins, and the risk of hip fracture. *J Bone Miner Res* 1999;14:129-35.
21. Wolf RL, Cauley JA, Pettinger M, *et al.* Lack of a relation between vitamin and mineral antioxidants and bone mineral density: results from the Women's Health Initiative. *Am J Clin Nutr* 2005;82:581-

1  
2  
3  
4  
5  
6  
7  
8  
9  
10  
11  
12  
13  
14  
15  
16  
17  
18  
19  
20  
21  
22  
23  
24  
25  
26  
27  
28  
29  
30  
31  
32  
33  
34  
35  
36  
37  
38  
39  
40  
41  
42  
43  
44  
45  
46  
47  
48  
49  
50  
51  
52  
53  
54  
55  
56  
57  
58  
59  
60

8.

22. Wang L, Yu H, Yang G, *et al.* Correlation between bone mineral density and serum trace element contents of elderly males in Beijing urban area. *Int J Clin Exp Med* 2015;8:19250-7.

23. Liu SZ, Yan H, Xu P, *et al.* Correlation analysis between bone mineral density and serum element contents of postmenopausal women in Xi'an urban area. *Biol Trace Elem Res* 2009;131:205-14.

For peer review only

**Table 1 Electronic search strategy in Pubmed**

| Number | Search terms                                                                                                                                                                                                                                                                                                                                                                                                                             |
|--------|------------------------------------------------------------------------------------------------------------------------------------------------------------------------------------------------------------------------------------------------------------------------------------------------------------------------------------------------------------------------------------------------------------------------------------------|
| 1      | selenium[mesh] or “selenious acid”[mesh] or selen*[tiab] or selepen[tiab] or organoselen*[tiab] or natriumselen*[tiab] or methylseleninic[tiab] or methylselenium[tiab] or selenomethionin*[tiab] or selenit*[tiab]                                                                                                                                                                                                                      |
| 2      | bone demineralization[mesh] or bone density[mesh] or osteopenia[mesh] or osteoporosis[mesh] or bone densitometry[mesh] or osteoporo*[tiab] or bone densit*[tiab] or bone loss[tiab] or osteomalacia[tiab] or osteodystrophy[tiab] or bone deminerali?ation[tiab] or osteopenia[tiab] or bone mass[tiab] or bone mineral content*[tiab] or bone defect*[tiab] or bone strength[tiab] or BMC[tiab] or “fracture”[mesh] or fracture* [tiab] |
| 3      | 1 AND 2                                                                                                                                                                                                                                                                                                                                                                                                                                  |

# Reporting checklist for protocol of a systematic review.

Based on the PRISMA-P guidelines.

## Instructions to authors

Complete this checklist by entering the page numbers from your manuscript where readers will find each of the items listed below.

Your article may not currently address all the items on the checklist. Please modify your text to include the missing information. If you are certain that an item does not apply, please write "n/a" and provide a short explanation.

Upload your completed checklist as an extra file when you submit to a journal.

In your methods section, say that you used the PRISMA-Reporting guidelines, and cite them as:

Moher D, Shamseer L, Clarke M, Ghersi D, Liberati A, Petticrew M, Shekelle P, Stewart LA. Preferred Reporting Items for Systematic Review and Meta-Analysis Protocols (PRISMA-P) 2015 statement. Syst Rev. 2015;4(1):1.

|                |                     |                                                                                    | Page   |
|----------------|---------------------|------------------------------------------------------------------------------------|--------|
|                |                     | Reporting Item                                                                     | Number |
| <b>Title</b>   |                     |                                                                                    |        |
| Identification | <a href="#">#1a</a> | Identify the report as a protocol of a systematic review                           | P1     |
| Update         | <a href="#">#1b</a> | If the protocol is for an update of a previous systematic review, identify as such | n/a    |

1 **Registration**

2

3

4 [#2](#) If registered, provide the name of the registry (such as P4, P7-8

5

6 PROSPERO) and registration number

7

8

9

10 **Authors**

11

12

13 **Contact** [#3a](#) Provide name, institutional affiliation, e-mail address of all P1-2

14

15 protocol authors; provide physical mailing address of

16

17 corresponding author

18

19

20 **Contribution** [#3b](#) Describe contributions of protocol authors and identify the P14-15

21

22 guarantor of the review

23

24

25

26 **Amendments**

27

28

29 [#4](#) If the protocol represents an amendment of a previously n/a

30

31 completed or published protocol, identify as such and list

32

33 changes; otherwise, state plan for documenting important

34

35 protocol amendments

36

37

38

39 **Support**

40

41

42 **Sources** [#5a](#) Indicate sources of financial or other support for the review P14

43

44

45 **Sponsor** [#5b](#) Provide name for the review funder and / or sponsor P14

46

47

48 **Role of sponsor or** [#5c](#) Describe roles of funder(s), sponsor(s), and / or institution(s), P14

49

50 funder

51 if any, in developing the protocol

52

53

54 **Introduction**

55

56

57 **Rationale** [#6](#) Describe the rationale for the review in the context of what is P6-7

58

59

60

|    |                      |                                                                                      |        |
|----|----------------------|--------------------------------------------------------------------------------------|--------|
| 1  |                      | already known                                                                        |        |
| 2  |                      |                                                                                      |        |
| 3  |                      |                                                                                      |        |
| 4  | Objectives           | <a href="#">#7</a> Provide an explicit statement of the question(s) the review will  | P8-9   |
| 5  |                      | address with reference to participants, interventions,                               |        |
| 6  |                      | comparators, and outcomes (PICO)                                                     |        |
| 7  |                      |                                                                                      |        |
| 8  |                      |                                                                                      |        |
| 9  |                      |                                                                                      |        |
| 10 |                      |                                                                                      |        |
| 11 | <b>Methods</b>       |                                                                                      |        |
| 12 |                      |                                                                                      |        |
| 13 |                      |                                                                                      |        |
| 14 | Eligibility criteria | <a href="#">#8</a> Specify the study characteristics (such as PICO, study design,    | P8-9   |
| 15 |                      | setting, time frame) and report characteristics (such as years                       |        |
| 16 |                      | considered, language, publication status) to be used as                              |        |
| 17 |                      | criteria for eligibility for the review                                              |        |
| 18 |                      |                                                                                      |        |
| 19 |                      |                                                                                      |        |
| 20 |                      |                                                                                      |        |
| 21 |                      |                                                                                      |        |
| 22 |                      |                                                                                      |        |
| 23 |                      |                                                                                      |        |
| 24 | Information          | <a href="#">#9</a> Describe all intended information sources (such as electronic     | P9     |
| 25 |                      | databases, contact with study authors, trial registers or other                      |        |
| 26 | sources              | grey literature sources) with planned dates of coverage                              |        |
| 27 |                      |                                                                                      |        |
| 28 |                      |                                                                                      |        |
| 29 |                      |                                                                                      |        |
| 30 |                      |                                                                                      |        |
| 31 |                      |                                                                                      |        |
| 32 | Search strategy      | <a href="#">#10</a> Present draft of search strategy to be used for at least one     | P18    |
| 33 |                      | electronic database, including planned limits, such that it                          |        |
| 34 |                      | could be repeated                                                                    |        |
| 35 |                      |                                                                                      |        |
| 36 |                      |                                                                                      |        |
| 37 |                      |                                                                                      |        |
| 38 |                      |                                                                                      |        |
| 39 | Study records -      | <a href="#">#11a</a> Describe the mechanism(s) that will be used to manage           | P10-11 |
| 40 |                      | records and data throughout the review                                               |        |
| 41 | data management      |                                                                                      |        |
| 42 |                      |                                                                                      |        |
| 43 |                      |                                                                                      |        |
| 44 |                      |                                                                                      |        |
| 45 | Study records -      | <a href="#">#11b</a> State the process that will be used for selecting studies (such | P9-10  |
| 46 |                      | as two independent reviewers) through each phase of the                              |        |
| 47 | selection process    | review (that is, screening, eligibility and inclusion in meta-                       |        |
| 48 |                      | analysis)                                                                            |        |
| 49 |                      |                                                                                      |        |
| 50 |                      |                                                                                      |        |
| 51 |                      |                                                                                      |        |
| 52 |                      |                                                                                      |        |
| 53 |                      |                                                                                      |        |
| 54 |                      |                                                                                      |        |
| 55 | Study records -      | <a href="#">#11c</a> Describe planned method of extracting data from reports         | P10    |
| 56 |                      | (such as piloting forms, done independently, in duplicate), any                      |        |
| 57 | data collection      |                                                                                      |        |
| 58 |                      |                                                                                      |        |
| 59 |                      |                                                                                      |        |
| 60 |                      |                                                                                      |        |



|    |                    |                      |                                                                                 |        |
|----|--------------------|----------------------|---------------------------------------------------------------------------------|--------|
| 1  | process            |                      | processes for obtaining and confirming data from investigators                  |        |
| 2  |                    |                      |                                                                                 |        |
| 3  |                    |                      |                                                                                 |        |
| 4  | Data items         | <a href="#">#12</a>  | List and define all variables for which data will be sought                     | P10    |
| 5  |                    |                      | (such as PICO items, funding sources), any pre-planned data                     |        |
| 6  |                    |                      | assumptions and simplifications                                                 |        |
| 7  |                    |                      |                                                                                 |        |
| 8  |                    |                      |                                                                                 |        |
| 9  |                    |                      |                                                                                 |        |
| 10 |                    |                      |                                                                                 |        |
| 11 | Outcomes and       | <a href="#">#13</a>  | List and define all outcomes for which data will be sought,                     | P8     |
| 12 |                    |                      |                                                                                 |        |
| 13 | prioritization     |                      | including prioritization of main and additional outcomes, with                  |        |
| 14 |                    |                      | rationale                                                                       |        |
| 15 |                    |                      |                                                                                 |        |
| 16 |                    |                      |                                                                                 |        |
| 17 |                    |                      |                                                                                 |        |
| 18 |                    |                      |                                                                                 |        |
| 19 | Risk of bias in    | <a href="#">#14</a>  | Describe anticipated methods for assessing risk of bias of                      | P10-11 |
| 20 |                    |                      |                                                                                 |        |
| 21 | individual studies |                      | individual studies, including whether this will be done at the                  |        |
| 22 |                    |                      | outcome or study level, or both; state how this information will                |        |
| 23 |                    |                      | be used in data synthesis                                                       |        |
| 24 |                    |                      |                                                                                 |        |
| 25 |                    |                      |                                                                                 |        |
| 26 |                    |                      |                                                                                 |        |
| 27 |                    |                      |                                                                                 |        |
| 28 |                    |                      |                                                                                 |        |
| 29 | Data synthesis     | <a href="#">#15a</a> | Describe criteria under which study data will be quantitatively                 | P10-11 |
| 30 |                    |                      | synthesised                                                                     |        |
| 31 |                    |                      |                                                                                 |        |
| 32 |                    |                      |                                                                                 |        |
| 33 |                    |                      |                                                                                 |        |
| 34 | Data synthesis     | <a href="#">#15b</a> | If data are appropriate for quantitative synthesis, describe                    | P11    |
| 35 |                    |                      | planned summary measures, methods of handling data and                          |        |
| 36 |                    |                      | methods of combining data from studies, including any                           |        |
| 37 |                    |                      | planned exploration of consistency (such as I <sup>2</sup> , Kendall's $\tau$ ) |        |
| 38 |                    |                      |                                                                                 |        |
| 39 |                    |                      |                                                                                 |        |
| 40 |                    |                      |                                                                                 |        |
| 41 |                    |                      |                                                                                 |        |
| 42 |                    |                      |                                                                                 |        |
| 43 |                    |                      |                                                                                 |        |
| 44 | Data synthesis     | <a href="#">#15c</a> | Describe any proposed additional analyses (such as                              | n/a    |
| 45 |                    |                      | sensitivity or subgroup analyses, meta-regression)                              |        |
| 46 |                    |                      |                                                                                 |        |
| 47 |                    |                      |                                                                                 |        |
| 48 |                    |                      |                                                                                 |        |
| 49 | Data synthesis     | <a href="#">#15d</a> | If quantitative synthesis is not appropriate, describe the type                 | n/a    |
| 50 |                    |                      | of summary planned                                                              |        |
| 51 |                    |                      |                                                                                 |        |
| 52 |                    |                      |                                                                                 |        |
| 53 |                    |                      |                                                                                 |        |
| 54 | Meta-bias(es)      | <a href="#">#16</a>  | Specify any planned assessment of meta-bias(es) (such as                        | P11    |
| 55 |                    |                      | publication bias across studies, selective reporting within                     |        |
| 56 |                    |                      |                                                                                 |        |
| 57 |                    |                      |                                                                                 |        |
| 58 |                    |                      |                                                                                 |        |
| 59 |                    |                      |                                                                                 |        |
| 60 |                    |                      |                                                                                 |        |

studies)

1  
2  
3  
4 Confidence in [#17](#) Describe how the strength of the body of evidence will be n/a  
5  
6 cumulative assessed (such as GRADE)  
7  
8 evidence  
9

10  
11 The PRISMA-P checklist is distributed under the terms of the Creative Commons Attribution License  
12  
13 CC-BY 4.0. This checklist was completed on 20. December 2019 using <https://www.goodreports.org/>,  
14  
15 a tool made by the [EQUATOR Network](#) in collaboration with [Penelope.ai](#)  
16  
17  
18  
19  
20  
21  
22  
23  
24  
25  
26  
27  
28  
29  
30  
31  
32  
33  
34  
35  
36  
37  
38  
39  
40  
41  
42  
43  
44  
45  
46  
47  
48  
49  
50  
51  
52  
53  
54  
55  
56  
57  
58  
59  
60

# BMJ Open

## Selenium and bone health: a protocol for a systematic review and meta-analysis

|                                 |                                                                                                                                                                                                                                                                                                                                                                                                                                                                                                                                                                                                                                                                                                                                                                                |
|---------------------------------|--------------------------------------------------------------------------------------------------------------------------------------------------------------------------------------------------------------------------------------------------------------------------------------------------------------------------------------------------------------------------------------------------------------------------------------------------------------------------------------------------------------------------------------------------------------------------------------------------------------------------------------------------------------------------------------------------------------------------------------------------------------------------------|
| Journal:                        | <i>BMJ Open</i>                                                                                                                                                                                                                                                                                                                                                                                                                                                                                                                                                                                                                                                                                                                                                                |
| Manuscript ID                   | bmjopen-2019-036612.R1                                                                                                                                                                                                                                                                                                                                                                                                                                                                                                                                                                                                                                                                                                                                                         |
| Article Type:                   | Protocol                                                                                                                                                                                                                                                                                                                                                                                                                                                                                                                                                                                                                                                                                                                                                                       |
| Date Submitted by the Author:   | 21-Jul-2020                                                                                                                                                                                                                                                                                                                                                                                                                                                                                                                                                                                                                                                                                                                                                                    |
| Complete List of Authors:       | Wang, Ning; Xiangya Hospital Central South University, Department of Orthopaedics<br>Xie, Dongxing; Xiangya Hospital Central South University, Department of Orthopaedics<br>Wu, Jing; Central South University Xiangya School of Public Health, Department of Epidemiology and Health Statistics<br>Wu, Ziyang; Xiangya Hospital Central South University, Department of Orthopaedics<br>he, hongyi; Xiangya Hospital Central South University, Department of Orthopaedics<br>Yang, Zidan; Central South University Xiangya School of Public Health, Department of Epidemiology and Health Statistics<br>Yang, Tuo; Xiangya Hospital Central South University, Health Management Center<br>Wang, Yilun; Xiangya Hospital Central South University, Department of Orthopaedics |
| <b>Primary Subject Heading</b>: | Nutrition and metabolism                                                                                                                                                                                                                                                                                                                                                                                                                                                                                                                                                                                                                                                                                                                                                       |
| Secondary Subject Heading:      | Public health                                                                                                                                                                                                                                                                                                                                                                                                                                                                                                                                                                                                                                                                                                                                                                  |
| Keywords:                       | Bone diseases < ORTHOPAEDIC & TRAUMA SURGERY, PUBLIC HEALTH, Orthopaedic & trauma surgery < SURGERY                                                                                                                                                                                                                                                                                                                                                                                                                                                                                                                                                                                                                                                                            |
|                                 |                                                                                                                                                                                                                                                                                                                                                                                                                                                                                                                                                                                                                                                                                                                                                                                |

SCHOLARONE™  
Manuscripts



I, the Submitting Author has the right to grant and does grant on behalf of all authors of the Work (as defined in the below author licence), an exclusive licence and/or a non-exclusive licence for contributions from authors who are: i) UK Crown employees; ii) where BMJ has agreed a CC-BY licence shall apply, and/or iii) in accordance with the terms applicable for US Federal Government officers or employees acting as part of their official duties; on a worldwide, perpetual, irrevocable, royalty-free basis to BMJ Publishing Group Ltd ("BMJ") its licensees and where the relevant Journal is co-owned by BMJ to the co-owners of the Journal, to publish the Work in this journal and any other BMJ products and to exploit all rights, as set out in our [licence](#).

The Submitting Author accepts and understands that any supply made under these terms is made by BMJ to the Submitting Author unless you are acting as an employee on behalf of your employer or a postgraduate student of an affiliated institution which is paying any applicable article publishing charge ("APC") for Open Access articles. Where the Submitting Author wishes to make the Work available on an Open Access basis (and intends to pay the relevant APC), the terms of reuse of such Open Access shall be governed by a Creative Commons licence – details of these licences and which [Creative Commons](#) licence will apply to this Work are set out in our licence referred to above.

Other than as permitted in any relevant BMJ Author's Self Archiving Policies, I confirm this Work has not been accepted for publication elsewhere, is not being considered for publication elsewhere and does not duplicate material already published. I confirm all authors consent to publication of this Work and authorise the granting of this licence.

1  
2  
3  
4 1 **Title: Selenium and bone health: a protocol for a systematic review and meta-**  
5  
6 2 **analysis**  
7  
8  
9 3

10  
11 4 **Authors:** Ning Wang<sup>1</sup>, Dongxing Xie<sup>1</sup>, Jing Wu<sup>2</sup>, Ziyang Wu<sup>1</sup>, Hongyi He<sup>1</sup>, Zidan  
12  
13 5 Yang<sup>2</sup>, Tuo Yang<sup>3</sup>, Yilun Wang<sup>1</sup>  
14  
15  
16 6

17  
18  
19 7 **Authors' affiliations:**

20  
21  
22 8 <sup>1</sup>Department of Orthopaedics, Xiangya Hospital, Central South University, Changsha,  
23  
24 9 Hunan, China

25  
26  
27 10 <sup>2</sup>Department of Epidemiology and Health Statistics, Xiangya School of Public Health,  
28  
29 11 Central South University, Changsha, Hunan, China

30  
31  
32 12 <sup>3</sup>Health Management Center, Xiangya Hospital, Central South University, Changsha,  
33  
34 13 Hunan, China  
35  
36  
37 14

38  
39  
40 15 **Abbreviated title:** Selenium and bone health  
41  
42  
43 16

44  
45  
46 17 **Keywords:** selenium, osteoporosis, serum, dietary, meta-analysis  
47  
48  
49 18

50  
51 19 **Word count:** 1714  
52  
53 20

54  
55  
56 21 **Email address for all authors:**

57  
58 22 Ning Wang, NingWang0405@csu.edu.cn  
59  
60

1  
2  
3  
4 1 Dongxing Xie, xdx1024@csu.edu.cn  
5

6  
7 2 Jing Wu, janice@csu.edu.cn  
8

9 3 Ziyang Wu, wuziyang@csu.edu.cn  
10

11 4 Hongyi He, hongyi\_He@csu.edu.cn  
12

13  
14 5 Zidan Yang, yzd0902@csu.edu.cn  
15

16  
17 6 Tuo Yang, yangtuo@csu.edu.cn  
18

19 7 Yilun Wang, yilun\_wang@csu.edu.cn  
20

21  
22 8  
23

24  
25 9 **Correspondence to: Yilun Wang**, Department of Orthopaedics, Xiangya Hospital,  
26

27 10 Central South University, Changsha, Hunan, China, E-mail: yilun\_Wang@csu.edu.cn.  
28

29  
30 11  
31  
32  
33  
34  
35  
36  
37  
38  
39  
40  
41  
42  
43  
44  
45  
46  
47  
48  
49  
50  
51  
52  
53  
54  
55  
56  
57  
58  
59  
60

1  
2  
3  
4 **1 ABSTRACT**  
5

6 **2 Introduction** Bone health affects the ability of human body to stay active and the  
7  
8  
9  
10  
11  
12  
13  
14  
15  
16  
17  
18  
19  
20  
21  
22  
23  
24  
25  
26  
27  
28  
29  
30  
31  
32  
33  
34  
35  
36  
37  
38  
39  
40  
41  
42  
43  
44  
45  
46  
47  
48  
49  
50  
51  
52  
53  
54  
55  
56  
57  
58  
59  
60  
degradation of bone health can cause considerable morbidity and mortality. The  
factors related to bone health play an important role in preventing osteoporosis and its  
adverse consequences. However, the risk factors of osteoporosis has not been fully  
elucidated. The deficiency of the trace element selenium may be one of the risk  
factors for the development of osteoporosis. Previous studies have investigated the  
effects of selenium on osteoporosis; however, the results are inconclusive. Therefore,  
the present study aimed to systematically examine the existing literature on the  
associations between dietary or serum selenium and bone mineral density (BMD),  
osteoporosis, or osteoporotic fractures, and to quantify such associations through  
meta-analysis.

13 **Methods and analysis** PubMed, Embase and Cochrane Library will be searched by  
14  
15  
16  
17  
18  
19  
20  
21  
22  
applying the specified search strategy to identify relevant studies up to October 2019.  
Both interventional and observational studies in humans will be included. The  
outcomes will include BMD and the prevalence or incidence of osteoporosis and  
osteoporotic fractures. For the dietary or serum selenium and BMD, osteoporosis, or  
osteoporotic fractures pooled analyses, estimates will be expressed as the mean  
difference, and the pooled odds ratio, relative risk, hazard ratio or beta coefficient and  
corresponding 95% confidence intervals. The heterogeneity of the studies and the  
publication bias will be investigated accordingly. To assess the quality and the risk of  
bias of the included studies, the Newcastle-Ottawa Scale or the Cochrane risk of bias

1  
2  
3  
4 1 assessment tool will be used where appropriate.  
5

6 2 **Ethics and dissemination** Since no private and confidential patient data will be  
7  
8  
9 3 contained in the reporting, approval from an ethics committee is not required. The  
10  
11 4 results will be published in a peer-reviewed journal. The study raises no ethical issues.  
12  
13

14 5 **PROSPERO registration number** CRD42019147188  
15  
16  
17  
18  
19  
20  
21  
22  
23  
24  
25  
26  
27  
28  
29  
30  
31  
32  
33  
34  
35  
36  
37  
38  
39  
40  
41  
42  
43  
44  
45  
46  
47  
48  
49  
50  
51  
52  
53  
54  
55  
56  
57  
58  
59  
60

For peer review only



## 1 **Strengths and limitations of the study**

- 2 ▶ As the first meta-analysis that evaluated the associations between dietary  
3 selenium intake or serum selenium concentrations and BMD, osteoporosis, or  
4 osteoporotic fractures, the findings of this study will deepen the existing  
5 knowledge base on the pathogenesis of osteoporosis, and promote the  
6 development of effective preventive or treatment strategies.
- 7 ▶ Two investigators will perform the study selection, data extraction and quality  
8 assessments independently, and disagreements will be resolved by discussions.
- 9 ▶ Both the quality and the risk of bias will be properly assessed for the included  
10 studies by applying the Newcastle-Ottawa Quality Scale or the Cochrane risk of  
11 bias assessment tool where appropriate.
- 12 ▶ The differences in study design and sample characteristics may lead to a high  
13 level of heterogeneity.
- 14 ▶ Both prospective and retrospective studies will be included in this meta-analysis,  
15 which may also incur bias and impact the final results .

## 1 INTRODUCTION

2 Bone health affects the ability of the human body to stay active throughout life, and  
3 the degradation of bone health can cause considerable morbidity and mortality.<sup>1 2</sup> The  
4 various factors related to bone health at different ages play an important role in  
5 preventing osteoporosis and its adverse consequences.<sup>3</sup> Bone health is mainly  
6 reflected in diseases caused by bone mass loss, such as osteoporosis and fragility  
7 fracture.<sup>4 5</sup> Osteoporosis, which is characterized by low bone mass and  
8 microarchitectural deterioration of bone tissue, is a systemic skeletal disease that can  
9 result in increased bone fragility and increased fracture risk as a consequence.<sup>3 6</sup> With  
10 an ageing population, the socioeconomic and medical impact of osteoporosis will  
11 increase rapidly. It is estimated that by 2020, there will be over 200 million people  
12 worldwide affected by osteoporosis, and the expenses related to osteoporosis will rise  
13 to about \$25.3 billion by 2025.<sup>7</sup> Osteoporosis is practically diagnosed by the presence  
14 of a fragility fracture or low bone mineral density (BMD) which is a commonly used  
15 proxy measure that accounts for approximately 70% of bone strength.<sup>3</sup> However,  
16 osteoporosis can occur without a known underlying cause, and its risk factors have  
17 not been fully elucidated.

18  
19 Nutrition has a significant influence on bone health and adequate nutrition is  
20 among the crucial cornerstones of the prevention of osteoporosis.<sup>8</sup> The trace element  
21 selenium, as a critical constituent of about 25 selenoenzymes, plays an essential role  
22 in a variety of physiological processes and it has been confirmed that the beneficial

1 effects of selenium are related to human health.<sup>9 10</sup> Some studies collectively  
2 suggested that the preservation of selenoproteins in bone was essential to normal  
3 skeletal development.<sup>11</sup> Animal studies have shown that selenium-deprivation can  
4 retard growth and change bone metabolism.<sup>12</sup> Such effects are associated with  
5 reduced BMD, impaired bone microarchitecture and increased bone resorption.  
6 Previous clinical studies have investigated the effects of selenium on bone health,  
7 however, the results are inconclusive. Some suggested that serum and dietary  
8 selenium were positively correlated with BMD,<sup>13 14</sup> while other showed that neither  
9 serum nor dietary selenium was associated with osteoporosis.<sup>15 16</sup> Meanwhile, some  
10 case-control studies revealed that the dietary intake of selenium was associated with  
11 reduced risk of osteoporotic hip fracture.<sup>17 18</sup>

12  
13 Meta-analysis is an effective tool for revealing trends that may not be apparent,  
14 and it also helps in establishing clinical policies and guidelines. Thus, we aimed to  
15 systematically examine the existing literature on the associations between dietary or  
16 serum selenium concentrations and BMD, osteoporosis, or osteoporotic fractures, and  
17 to quantify such associations through meta-analysis where feasible.

## 18 19 **METHODS**

### 20 **Study design**

21 The aim of this meta-analysis is to investigate the associations between dietary intake  
22 or serum levels of selenium and BMD, osteoporosis, or osteoporotic fractures. This

1 protocol was developed according to the Preferred Reporting Items for Systematic  
2 Review and Meta-Analyses Protocols (PRISMA-P) 2015 Statement,<sup>19</sup> and has been  
3 registered in the international prospective register of systematic reviews PROSPERO  
4 network (registration number: CRD42019147188).

## 6 **Eligibility criteria**

### 7 Types of studies

8 The meta-analysis will include both interventional and observational studies in  
9 humans, inclusive of case-control studies, randomized controlled trials, cross-  
10 sectional studies and cohort studies which focus on the associations between dietary  
11 intake or serum levels of selenium and BMD, osteoporosis, or osteoporotic fractures.

### 13 Types of participants

14 The participants in the included studies must have provided information on dietary  
15 intake or serum levels of selenium, and BMD measures or diagnosis of osteoporosis  
16 or osteoporotic fractures. No age, sex, ethnicity, economic status, geographical  
17 limitations, or education restrictions will be applied.

### 19 Types of exposure/intervention

20 Two main forms of exposure will be included, i.e., dietary intake selenium and serum  
21 levels of selenium.

## 1 Types of outcome measures

2 Primary outcomes will include T-score , BMD values and the prevalence or incidence  
3 of osteoporosis. The diagnostic criteria of osteoporosis shall be based on the included  
4 articles, such as the presence of a fragility fracture or using BMD criteria. The  
5 secondary outcome will be the prevalence or incidence of osteoporotic fractures.  
6 There will be no restriction on site and measuring method, but we will give priority to  
7 extracting T-score for analysis rather than to extracting BMD values. When T-score is  
8 not available, we will try to analyze BMD measured with Lunar and Hologic  
9 machines separately.

## 11 **Information sources**

12 Systematic literature searches will be undertaken across PubMed, Embase and  
13 Cochrane Library by applying the specified search strategy to identify relevant studies  
14 up to October 2019 on each platform or database. In addition, the references of the  
15 retrieved literature will be manually searched. And Grey literature will also be  
16 searched included study registries (e.g., ClinicalTrials.gov and google scholar). The  
17 relevant studies and systematic reviews will be scanned for additional eligible studies.

## 19 **Search strategy**

20 Keyword terms or medical subject heading terms (MESH) will be used to search for  
21 eligible studies in the databases mentioned above. The electronic search strategy is  
22 presented in **Table 1**. All the search terms will be adapted for different syntax rules of

1  
2  
3  
4 1 the databases.  
5  
6

7 2  
8

9 3 **Study selection**  
10

11 4 The search results from the three electronic databases will be sent to Endnote. After  
12  
13 5 removing duplicates, two investigators will be responsible for screening the titles and  
14  
15 6 abstracts of all the retrieved literature to identify eligible studies. In case that the  
16  
17 7 eligibility of a study cannot be determined, the full text will be reviewed for inclusion  
18  
19 8 according to prespecified inclusion and exclusion criteria. There will be no restriction  
20  
21 9 on the publication date and language. The study selection process will be summarized  
22  
23 10 based on the PRISMA flow diagram. Disagreements between the two investigators  
24  
25 11 will be resolved by discussing with a third investigator.  
26  
27  
28  
29  
30  
31  
32  
33  
34

35 13 **Data extraction**  
36

37 14 Two investigators will be engaged to independently extract the following data in a  
38  
39 15 standardized collection form: publication information (author, year of publishing);  
40  
41 16 study information (country of origin, study setting, data sources, study period);  
42  
43 17 demographic information (sample size, age, and sex distribution); exposure  
44  
45 18 information (dietary or serum selenium concentrations); outcome information (T-  
46  
47 19 score, BMD values, the prevalence or incidence of osteoporosis or osteoporotic  
48  
49 20 fractures). Then, both the adjusted and unadjusted effect sizes (mean difference [MD],  
50  
51 21 odds ratio [OR], relative risk [RR], hazard ratio [HR] or beta coefficient [ $\beta$ ]) will be  
52  
53 22 either extracted directly or calculated based on the information in the original studies  
54  
55  
56  
57  
58  
59  
60

1 whenever possible. If the relevant data is not reported in an included study, the  
2 missing information will be obtained by contacting the authors directly as far as  
3 possible. The two investigators responsible for reviewing the literature will resolve  
4 any disagreements through discussions, and a third independent investigator may be  
5 involved into the discussion if required.

6

### 7 **Assessment of risk of bias**

8 The Cochrane risk of bias assessment tool will be used to assess the quality of  
9 RCTs,<sup>20</sup> while the Newcastle-Ottawa Quality Scale (NOS) will be used to assess the  
10 quality of observational studies.<sup>21</sup> Two investigators will be engaged to conduct the  
11 risk of bias assessment independently, and disagreements will be resolved through  
12 discussions.

13

### 14 **Data analysis**

15 Firstly, the characteristics of included studies will be summarized using baseline  
16 tables and narrative texts. The proposed study will calculate the MD, the pooled OR,  
17 RR, HR or  $\beta$  and the corresponding 95% CIs. Unadjusted risk estimates and adjusted  
18 estimates will be pooled in the meta-analysis. Then, Cochrane's Q test and the  $I^2$   
19 statistics will be used to assess the heterogeneity of the included studies, where  $p$   
20 value  $> 0.05$  of the Q statistics and  $I^2$  value  $< 50\%$  indicate statistical homogeneity.<sup>22</sup>

21 <sup>23</sup> If the included studies are found to be statistically homogeneous, the fixed effects  
22 models will be used to pool the data during meta-analysis; otherwise, the random

1 effects models will be used instead. Statistical analyses will be conducted in Review  
2 Manager-5.3 (Copenhagen: The Nordic Cochrane Centre, The Cochrane  
3 Collaboration, 2014) and Stata-11.0 (StataCorp LP, College Station, TX) statistical  
4 software. Statistical significance is considered at  $p$  value  $< 0.05$ . Finally, to minimize  
5 the heterogeneity between included studies, subgroup analyses based on different age,  
6 sex, ethnicity, economic status, geographical limitations, or education restrictions will  
7 be conducted where feasible.

8

### 9 **Assessment of publication bias**

10 If the number of included studies is greater than 10, a funnel plot will be constructed  
11 and the Egger test will be conducted to observe the publication bias. The existence of  
12 publication bias is confirmed when the funnel plot shows an asymmetric pattern.  
13 Then, the bias, if any, will be explained through discussions after assessment.

14

### 15 **Patient and public involvement**

16 As our systematic review will be implemented based on published studies, no patients  
17 and members of the public will be directly involved. All the data to be used in this  
18 study already exists in the published literature and/or the aforementioned sources.

19

### 20 **Ethics and dissemination**

21 As this meta-analysis will be performed based on published studies, and no private  
22 and confidential patient data will be contained in the reporting, approval from an

23

24



1 ethics committee is not required. The results will be disseminated through publication  
2 in a peer- reviewed journal. The study raises no ethical issues.

#### 4 **DISCUSSION**

5 The health of the skeletal system is important for elderly people.<sup>1</sup> An in-depth  
6 understanding of the relationship between selenium and bone health is useful for  
7 designing early life interventions. To our best knowledge, there are at least 10 studies  
8 that have investigated the associations between dietary or serum selenium  
9 concentrations and BMD, osteoporosis, or osteoporotic fractures. Of them, two  
10 studies suggested that serum and dietary selenium were likely to positively correlate  
11 with BMD,<sup>13 14</sup> and three studies showed that dietary selenium was negatively  
12 associated with osteoporotic fractures.<sup>17 18 24</sup> On the contrary, one study found no  
13 association between dietary selenium and BMD,<sup>25</sup> and four studies reported that  
14 neither serum nor dietary selenium was related to osteoporosis.<sup>15 16 26 27</sup> Contradictory  
15 results of these studies might be related to the differences in study design and sample  
16 characteristics. So it's still controversial whether the contents of selenium can directly  
17 influence BMD and affect the pathogenesis of osteoporosis. The sample size of  
18 previous studies might have been too small to achieve sufficient statistical power,  
19 which could explain, at least in part, why the statistical difference in some instances  
20 was not reached, despite the obvious trends. Therefore, the aim of this systematic  
21 review and meta-analysis is to summarize the available evidence to investigate the  
22 associations between selenium and bone health. The results of this study will deepen

1  
2  
3  
4  
5  
6  
7  
8  
9  
10  
11  
12  
13  
14  
15  
16  
17  
18  
19  
20  
21  
22  
23  
24  
25  
26  
27  
28  
29  
30  
31  
32  
33  
34  
35  
36  
37  
38  
39  
40  
41  
42  
43  
44  
45  
46  
47  
48  
49  
50  
51  
52  
53  
54  
55  
56  
57  
58  
59  
60

- 1 the existing knowledge base on the pathogenesis of osteoporosis, and promote the
- 2 development of preventive or treatment strategies in this field.

For peer review only

1  
2  
3  
4 **1 COMPETING INTERESTS**

5  
6  
7 2 The authors declare that they have no conflict of interest.  
8  
9 3

10  
11  
12 **4 PATIENT CONSENT FOR PUBLICATION**

13  
14 5 Not required.  
15  
16  
17 6

18  
19  
20 **7 FUNDING**

21  
22 8 This work was supported by the National Natural Science Foundation of China  
23  
24 9 (81772413, 81601941, 81702207, 81702206), the National Key Research and  
25  
26  
27 10 Development Program of China (2018YFB1105705), the Scientific Research Project  
28  
29  
30 11 of Science and Technology Office of Hunan Province (2017TP1005), the Key  
31  
32  
33 12 Research and Development Program of Hunan Province (2018SK2070,  
34  
35  
36 13 2017SK2071), the Young Investigator Grant of Xiangya Hospital, Central South  
37  
38  
39 14 University (2016Q03, 2016Q06, 2017Q10), the Xiangya Clinical Big Data System  
40  
41  
42 15 Construction Project of Central South University (45), and the Natural Science  
43  
44  
45 16 Foundation of Hunan Province (2017JJ3491, 2017JJ3492, 2018JJ3825,  
46  
47  
48 17 2019JJ50965).  
49  
50  
51 18

52  
53  
54 **19 AUTHOR'S CONTRIBUTIONS**

55  
56 20 Conceptualization: Yilun Wang and Dongxing Xie

57  
58 21 Data curation: Jing Wu, Ziyang Wu, Hongyi He, Zidan Yang

59  
60 22 Methodology: Jing Wu, Ziyang Wu, Hongyi He, Zidan Yang

1  
2  
3  
4  
5  
6  
7  
8  
9  
10  
11  
12  
13  
14  
15  
16  
17  
18  
19  
20  
21  
22  
23  
24  
25  
26  
27  
28  
29  
30  
31  
32  
33  
34  
35  
36  
37  
38  
39  
40  
41  
42  
43  
44  
45  
46  
47  
48  
49  
50  
51  
52  
53  
54  
55  
56  
57  
58  
59  
60

- 1 Writing – original draft: Ning Wang and Dongxing Xie
- 2 Writing – review & editing: Yilun Wang and Tuo Yang

For peer review only

## 1 REFERENCES

1. van den Bergh JP, van Geel TA, Geusens PP. Osteoporosis, frailty and fracture: implications for case finding and therapy. *Nat Rev Rheumatol* 2012;8:163-72.
2. Farhat GN, Cauley JA. The link between osteoporosis and cardiovascular disease. *Clin Cases Miner Bone Metab* 2008;5:19-34.
3. NIH Consensus Development Panel on Osteoporosis Prevention, Diagnosis, and Therapy. Osteoporosis prevention, diagnosis, and therapy. *JAMA* 2001;285:785-95.
4. Hampton T. Experts urge early investment in bone health. *JAMA*. 2004;291(7):811-812.
5. Bundred NJ. Optimising bone health in survivors of breast cancer. *Lancet Oncol*. 2007;8(2):89-91.
6. Kanis JA. Assessment of fracture risk and its application to screening for postmenopausal osteoporosis: synopsis of a WHO report. WHO Study Group. *Osteoporos Int* 1994;4:368-81.
7. Burge R, Dawson-Hughes B, Solomon DH, *et al*. Incidence and economic burden of osteoporosis-related fractures in the United States, 2005-2025. *J Bone Miner Res* 2007;22:465-75.
8. Chen LR, Hou PH, Chen KH. Nutritional Support and Physical Modalities for People with Osteoporosis: Current Opinion. *Nutrients* 2019;11:e 2848.
9. Whanger PD. Selenium and its relationship to cancer: an update. *Br J Nutr* 2004;91:11-28.
10. Rayman MP. Selenoproteins and human health: insights from epidemiological data. *Biochim Biophys Acta* 2009;1790:1533-40.
11. Zhang Z, Zhang J, Xiao J. Selenoproteins and selenium status in bone physiology and pathology. *Biochim Biophys Acta* 2014;1840:3246-56.
12. Moreno-Reyes R, Egrise D, Neve J, *et al*. Selenium deficiency-induced growth retardation is associated with an impaired bone metabolism and osteopenia. *J Bone Miner Res* 2001;16:1556-63.
13. Beukhof CM, Medici M, van den Beld AW, *et al*. Selenium status is positively associated with bone mineral density in healthy aging European men. *PLoS One* 2016;11:e0152748.
14. Rivas A, Romero A, Mariscal-Arcas M, *et al*. Association between dietary antioxidant quality score (DAQs) and bone mineral density in Spanish women. *Nutr Hosp* 2012;27:1886-93.
15. Arıkan DC, Coskun A, Ozer A, *et al*. Plasma selenium, zinc, copper and lipid levels in postmenopausal Turkish women and their relation with osteoporosis. *Biol Trace Elem Res* 2011;144:407-17.
16. Ilich JZ, Cvijetic S, Baric IC, *et al*. Nutrition and lifestyle in relation to bone health and body weight in Croatian postmenopausal women. *Int J Food Sci Nutr* 2009;60:319-32.
17. Zhang J, Munger RG, West NA, *et al*. Antioxidant intake and risk of osteoporotic hip fracture in Utah: an effect modified by smoking status. *Am J Epidemiol* 2006;163:9-17.
18. Sun LL, Li BL, Xie HL, *et al*. Associations between the dietary intake of antioxidant nutrients and the risk of hip fracture in elderly Chinese: a case-control study. *Br J Nutr* 2014;112:1706-14.
19. Moher D, Shamseer L, Clarke M, *et al*. Preferred reporting items for systematic review and meta-analysis protocols (PRISMA-P) 2015 statement. *Syst Rev* 2015;4:1.
20. Whiting P, Savovic J, Higgins JP, *et al*. ROBIS: A new tool to assess risk of bias in systematic reviews was developed. *J Clin Epidemiol* 2016;69:225-34.
21. Stang A. Critical evaluation of the Newcastle-Ottawa scale for the assessment of the quality of nonrandomized studies in meta-analyses. *Eur J Epidemiol* 2010;25:603-5.
22. Zeng C, Li H, Yang T, *et al*. Effectiveness of continuous and pulsed ultrasound for the management of knee osteoarthritis: a systematic review and network meta-analysis. *Osteoarthritis Cartilage*

- 1  
2  
3 1 2014;22: 1090–9.  
4 2 23. Zeng C, Li H, Yang T, et al. Electrical stimulation for pain relief in knee osteoarthritis: systematic  
5 3 review and network meta-analysis. *Osteoarthritis Cartilage* 2015;23:189–202.  
6 4 24. Melhus H, Michaelsson K, Holmberg L, et al. Smoking, antioxidant vitamins, and the risk of hip  
7 5 fracture. *J Bone Miner Res* 1999;14:129-35.  
8 6 25. Wolf RL, Cauley JA, Pettinger M, et al. Lack of a relation between vitamin and mineral antioxidants  
9 7 and bone mineral density: results from the Women's Health Initiative. *Am J Clin Nutr* 2005;82:581-  
10 8 8.  
11 9 26. Wang L, Yu H, Yang G, et al. Correlation between bone mineral density and serum trace element  
12 10 contents of elderly males in Beijing urban area. *Int J Clin Exp Med* 2015;8:19250-7.  
13 11 27. Liu SZ, Yan H, Xu P, et al. Correlation analysis between bone mineral density and serum element  
14 12 contents of postmenopausal women in Xi'an urban area. *Biol Trace Elem Res* 2009;131:205-14.  
15  
16  
17  
18  
19  
20  
21  
22  
23  
24  
25  
26  
27  
28  
29  
30  
31  
32  
33  
34  
35  
36  
37  
38  
39  
40  
41  
42  
43  
44  
45  
46  
47  
48  
49  
50  
51  
52  
53  
54  
55  
56  
57  
58  
59  
60

1 **Table 1 Electronic search strategy in Pubmed**

| Number | Search terms                                                                                                                                                                                                                                                                                                                                                                                                                             |
|--------|------------------------------------------------------------------------------------------------------------------------------------------------------------------------------------------------------------------------------------------------------------------------------------------------------------------------------------------------------------------------------------------------------------------------------------------|
| 1      | selenium[mesh] or “selenious acid”[mesh] or selen*[tiab] or selepen[tiab] or organoselen*[tiab] or natriumselen*[tiab] or methylseleninic[tiab] or methylselenium[tiab] or selenomethionin*[tiab] or selenit*[tiab]                                                                                                                                                                                                                      |
| 2      | bone demineralization[mesh] or bone density[mesh] or osteopenia[mesh] or osteoporosis[mesh] or bone densitometry[mesh] or osteoporo*[tiab] or bone densit*[tiab] or bone loss[tiab] or osteomalacia[tiab] or osteodystrophy[tiab] or bone deminerali?ation[tiab] or osteopenia[tiab] or bone mass[tiab] or bone mineral content*[tiab] or bone defect*[tiab] or bone strength[tiab] or BMC[tiab] or “fracture”[mesh] or fracture* [tiab] |
| 3      | 1 AND 2                                                                                                                                                                                                                                                                                                                                                                                                                                  |

2

# Reporting checklist for protocol of a systematic review.

Based on the PRISMA-P guidelines.

## Instructions to authors

Complete this checklist by entering the page numbers from your manuscript where readers will find each of the items listed below.

Your article may not currently address all the items on the checklist. Please modify your text to include the missing information. If you are certain that an item does not apply, please write "n/a" and provide a short explanation.

Upload your completed checklist as an extra file when you submit to a journal.

In your methods section, say that you used the PRISMA-Reporting guidelines, and cite them as:

Moher D, Shamseer L, Clarke M, Ghersi D, Liberati A, Petticrew M, Shekelle P, Stewart LA. Preferred Reporting Items for Systematic Review and Meta-Analysis Protocols (PRISMA-P) 2015 statement. Syst Rev. 2015;4(1):1.

|                |                     |                                                                                    | Page   |
|----------------|---------------------|------------------------------------------------------------------------------------|--------|
|                |                     | Reporting Item                                                                     | Number |
| <b>Title</b>   |                     |                                                                                    |        |
| Identification | <a href="#">#1a</a> | Identify the report as a protocol of a systematic review                           | P1     |
| Update         | <a href="#">#1b</a> | If the protocol is for an update of a previous systematic review, identify as such | n/a    |



## Registration

[#2](#) If registered, provide the name of the registry (such as PROSPERO) and registration number P4, P7-8

## Authors

[#3a](#) Provide name, institutional affiliation, e-mail address of all protocol authors; provide physical mailing address of corresponding author P1-2

[#3b](#) Describe contributions of protocol authors and identify the guarantor of the review P14-15

## Amendments

[#4](#) If the protocol represents an amendment of a previously completed or published protocol, identify as such and list changes; otherwise, state plan for documenting important protocol amendments n/a

## Support

[#5a](#) Indicate sources of financial or other support for the review P14

[#5b](#) Provide name for the review funder and / or sponsor P14

[#5c](#) Describe roles of funder(s), sponsor(s), and / or institution(s), if any, in developing the protocol P14

## Introduction

[#6](#) Describe the rationale for the review in the context of what is P6-7

1 already known  
2

3  
4 Objectives

[#7](#)

5 Provide an explicit statement of the question(s) the review will  
6 address with reference to participants, interventions,  
7 comparators, and outcomes (PICO)  
8  
9

P8-9

10  
11 **Methods**  
12

13  
14 Eligibility criteria

[#8](#)

15 Specify the study characteristics (such as PICO, study design,  
16 setting, time frame) and report characteristics (such as years  
17 considered, language, publication status) to be used as  
18 criteria for eligibility for the review  
19  
20  
21

P8-9

22  
23  
24 Information

[#9](#)

25 Describe all intended information sources (such as electronic  
26 databases, contact with study authors, trial registers or other  
27 grey literature sources) with planned dates of coverage  
28  
29

P9

30  
31  
32 Search strategy

[#10](#)

33 Present draft of search strategy to be used for at least one  
34 electronic database, including planned limits, such that it  
35 could be repeated  
36  
37  
38

P18

39 Study records -

[#11a](#)

40 Describe the mechanism(s) that will be used to manage  
41 records and data throughout the review  
42  
43

P10-11

44 data management

45 Study records -

[#11b](#)

46 State the process that will be used for selecting studies (such  
47 as two independent reviewers) through each phase of the  
48 review (that is, screening, eligibility and inclusion in meta-  
49 analysis)  
50  
51  
52

P9-10

53  
54 Study records -

[#11c](#)

55 Describe planned method of extracting data from reports  
56 (such as piloting forms, done independently, in duplicate), any  
57  
58

P10

59 data collection

|    |                    |                      |                                                                                 |        |
|----|--------------------|----------------------|---------------------------------------------------------------------------------|--------|
| 1  | process            |                      | processes for obtaining and confirming data from investigators                  |        |
| 2  |                    |                      |                                                                                 |        |
| 3  |                    |                      |                                                                                 |        |
| 4  | Data items         | <a href="#">#12</a>  | List and define all variables for which data will be sought                     | P10    |
| 5  |                    |                      | (such as PICO items, funding sources), any pre-planned data                     |        |
| 6  |                    |                      | assumptions and simplifications                                                 |        |
| 7  |                    |                      |                                                                                 |        |
| 8  |                    |                      |                                                                                 |        |
| 9  |                    |                      |                                                                                 |        |
| 10 |                    |                      |                                                                                 |        |
| 11 | Outcomes and       | <a href="#">#13</a>  | List and define all outcomes for which data will be sought,                     | P8     |
| 12 |                    |                      |                                                                                 |        |
| 13 | prioritization     |                      | including prioritization of main and additional outcomes, with                  |        |
| 14 |                    |                      | rationale                                                                       |        |
| 15 |                    |                      |                                                                                 |        |
| 16 |                    |                      |                                                                                 |        |
| 17 |                    |                      |                                                                                 |        |
| 18 |                    |                      |                                                                                 |        |
| 19 | Risk of bias in    | <a href="#">#14</a>  | Describe anticipated methods for assessing risk of bias of                      | P10-11 |
| 20 |                    |                      |                                                                                 |        |
| 21 | individual studies |                      | individual studies, including whether this will be done at the                  |        |
| 22 |                    |                      | outcome or study level, or both; state how this information will                |        |
| 23 |                    |                      | be used in data synthesis                                                       |        |
| 24 |                    |                      |                                                                                 |        |
| 25 |                    |                      |                                                                                 |        |
| 26 |                    |                      |                                                                                 |        |
| 27 |                    |                      |                                                                                 |        |
| 28 |                    |                      |                                                                                 |        |
| 29 | Data synthesis     | <a href="#">#15a</a> | Describe criteria under which study data will be quantitatively                 | P10-11 |
| 30 |                    |                      | synthesised                                                                     |        |
| 31 |                    |                      |                                                                                 |        |
| 32 |                    |                      |                                                                                 |        |
| 33 |                    |                      |                                                                                 |        |
| 34 | Data synthesis     | <a href="#">#15b</a> | If data are appropriate for quantitative synthesis, describe                    | P11    |
| 35 |                    |                      | planned summary measures, methods of handling data and                          |        |
| 36 |                    |                      | methods of combining data from studies, including any                           |        |
| 37 |                    |                      | planned exploration of consistency (such as I <sup>2</sup> , Kendall's $\tau$ ) |        |
| 38 |                    |                      |                                                                                 |        |
| 39 |                    |                      |                                                                                 |        |
| 40 |                    |                      |                                                                                 |        |
| 41 |                    |                      |                                                                                 |        |
| 42 |                    |                      |                                                                                 |        |
| 43 |                    |                      |                                                                                 |        |
| 44 | Data synthesis     | <a href="#">#15c</a> | Describe any proposed additional analyses (such as                              | n/a    |
| 45 |                    |                      | sensitivity or subgroup analyses, meta-regression)                              |        |
| 46 |                    |                      |                                                                                 |        |
| 47 |                    |                      |                                                                                 |        |
| 48 |                    |                      |                                                                                 |        |
| 49 | Data synthesis     | <a href="#">#15d</a> | If quantitative synthesis is not appropriate, describe the type                 | n/a    |
| 50 |                    |                      | of summary planned                                                              |        |
| 51 |                    |                      |                                                                                 |        |
| 52 |                    |                      |                                                                                 |        |
| 53 |                    |                      |                                                                                 |        |
| 54 |                    |                      |                                                                                 |        |
| 55 | Meta-bias(es)      | <a href="#">#16</a>  | Specify any planned assessment of meta-bias(es) (such as                        | P11    |
| 56 |                    |                      | publication bias across studies, selective reporting within                     |        |
| 57 |                    |                      |                                                                                 |        |
| 58 |                    |                      |                                                                                 |        |
| 59 |                    |                      |                                                                                 |        |
| 60 |                    |                      |                                                                                 |        |

studies)

1  
2  
3  
4 Confidence in [#17](#) Describe how the strength of the body of evidence will be n/a  
5  
6 cumulative assessed (such as GRADE)  
7  
8 evidence  
9

10  
11 The PRISMA-P checklist is distributed under the terms of the Creative Commons Attribution License  
12  
13 CC-BY 4.0. This checklist was completed on 20. December 2019 using <https://www.goodreports.org/>,  
14  
15 a tool made by the [EQUATOR Network](#) in collaboration with [Penelope.ai](#)  
16  
17  
18  
19  
20  
21  
22  
23  
24  
25  
26  
27  
28  
29  
30  
31  
32  
33  
34  
35  
36  
37  
38  
39  
40  
41  
42  
43  
44  
45  
46  
47  
48  
49  
50  
51  
52  
53  
54  
55  
56  
57  
58  
59  
60

# BMJ Open

## Selenium and bone health: a protocol for a systematic review and meta-analysis

|                                 |                                                                                                                                                                                                                                                                                                                                                                                                                                                                                                                                                                                                                                                                                                                                                                                |
|---------------------------------|--------------------------------------------------------------------------------------------------------------------------------------------------------------------------------------------------------------------------------------------------------------------------------------------------------------------------------------------------------------------------------------------------------------------------------------------------------------------------------------------------------------------------------------------------------------------------------------------------------------------------------------------------------------------------------------------------------------------------------------------------------------------------------|
| Journal:                        | <i>BMJ Open</i>                                                                                                                                                                                                                                                                                                                                                                                                                                                                                                                                                                                                                                                                                                                                                                |
| Manuscript ID                   | bmjopen-2019-036612.R2                                                                                                                                                                                                                                                                                                                                                                                                                                                                                                                                                                                                                                                                                                                                                         |
| Article Type:                   | Protocol                                                                                                                                                                                                                                                                                                                                                                                                                                                                                                                                                                                                                                                                                                                                                                       |
| Date Submitted by the Author:   | 11-Sep-2020                                                                                                                                                                                                                                                                                                                                                                                                                                                                                                                                                                                                                                                                                                                                                                    |
| Complete List of Authors:       | Wang, Ning; Xiangya Hospital Central South University, Department of Orthopaedics<br>Xie, Dongxing; Xiangya Hospital Central South University, Department of Orthopaedics<br>Wu, Jing; Central South University Xiangya School of Public Health, Department of Epidemiology and Health Statistics<br>Wu, Ziyang; Xiangya Hospital Central South University, Department of Orthopaedics<br>he, hongyi; Xiangya Hospital Central South University, Department of Orthopaedics<br>Yang, Zidan; Central South University Xiangya School of Public Health, Department of Epidemiology and Health Statistics<br>Yang, Tuo; Xiangya Hospital Central South University, Health Management Center<br>Wang, Yilun; Xiangya Hospital Central South University, Department of Orthopaedics |
| <b>Primary Subject Heading</b>: | Nutrition and metabolism                                                                                                                                                                                                                                                                                                                                                                                                                                                                                                                                                                                                                                                                                                                                                       |
| Secondary Subject Heading:      | Public health                                                                                                                                                                                                                                                                                                                                                                                                                                                                                                                                                                                                                                                                                                                                                                  |
| Keywords:                       | Bone diseases < ORTHOPAEDIC & TRAUMA SURGERY, PUBLIC HEALTH, Orthopaedic & trauma surgery < SURGERY                                                                                                                                                                                                                                                                                                                                                                                                                                                                                                                                                                                                                                                                            |
|                                 |                                                                                                                                                                                                                                                                                                                                                                                                                                                                                                                                                                                                                                                                                                                                                                                |

SCHOLARONE™  
Manuscripts



I, the Submitting Author has the right to grant and does grant on behalf of all authors of the Work (as defined in the below author licence), an exclusive licence and/or a non-exclusive licence for contributions from authors who are: i) UK Crown employees; ii) where BMJ has agreed a CC-BY licence shall apply, and/or iii) in accordance with the terms applicable for US Federal Government officers or employees acting as part of their official duties; on a worldwide, perpetual, irrevocable, royalty-free basis to BMJ Publishing Group Ltd ("BMJ") its licensees and where the relevant Journal is co-owned by BMJ to the co-owners of the Journal, to publish the Work in this journal and any other BMJ products and to exploit all rights, as set out in our [licence](#).

The Submitting Author accepts and understands that any supply made under these terms is made by BMJ to the Submitting Author unless you are acting as an employee on behalf of your employer or a postgraduate student of an affiliated institution which is paying any applicable article publishing charge ("APC") for Open Access articles. Where the Submitting Author wishes to make the Work available on an Open Access basis (and intends to pay the relevant APC), the terms of reuse of such Open Access shall be governed by a Creative Commons licence – details of these licences and which [Creative Commons](#) licence will apply to this Work are set out in our licence referred to above.

Other than as permitted in any relevant BMJ Author's Self Archiving Policies, I confirm this Work has not been accepted for publication elsewhere, is not being considered for publication elsewhere and does not duplicate material already published. I confirm all authors consent to publication of this Work and authorise the granting of this licence.

1  
2  
3  
4 1 **Title: Selenium and bone health: a protocol for a systematic review and meta-**  
5  
6 2 **analysis**  
7  
8  
9  
10 3

11 4 **Authors:** Ning Wang<sup>1</sup>, Dongxing Xie<sup>1</sup>, Jing Wu<sup>2</sup>, Ziyang Wu<sup>1</sup>, Hongyi He<sup>1</sup>, Zidan  
12  
13  
14 5 Yang<sup>2</sup>, Tuo Yang<sup>3</sup>, Yilun Wang<sup>1</sup>  
15  
16  
17 6

18  
19  
20 7 **Authors' affiliations:**

21  
22 8 <sup>1</sup>Department of Orthopaedics, Xiangya Hospital, Central South University, Changsha,  
23  
24  
25 9 Hunan, China  
26

27 10 <sup>2</sup>Department of Epidemiology and Health Statistics, Xiangya School of Public Health,  
28  
29  
30 11 Central South University, Changsha, Hunan, China  
31

32 12 <sup>3</sup>Health Management Center, Xiangya Hospital, Central South University, Changsha,  
33  
34  
35 13 Hunan, China  
36  
37  
38 14

39  
40 15 **Abbreviated title:** Selenium and bone health  
41  
42  
43 16

44  
45 17 **Keywords:** selenium, osteoporosis, serum, dietary, meta-analysis  
46  
47  
48 18

49  
50 19 **Word count:** 1827  
51  
52  
53 20

54  
55  
56 21 **Email address for all authors:**

57  
58 22 Ning Wang, NingWang0405@csu.edu.cn  
59  
60

1  
2  
3  
4 1 Dongxing Xie, xdx1024@csu.edu.cn  
5

6  
7 2 Jing Wu, janice@csu.edu.cn  
8

9 3 Ziying Wu, wuziying@csu.edu.cn  
10

11 4 Hongyi He, hongyi\_He@csu.edu.cn  
12

13  
14 5 Zidan Yang, yzd0902@csu.edu.cn  
15

16  
17 6 Tuo Yang, yangtuo@csu.edu.cn  
18

19 7 Yilun Wang, yilun\_wang@csu.edu.cn  
20

21  
22 8  
23

24  
25 9 **Correspondence to: Yilun Wang**, Department of Orthopaedics, Xiangya Hospital,  
26

27 10 Central South University, Changsha, Hunan, China, E-mail: yilun\_Wang@csu.edu.cn.  
28

29  
30 11  
31  
32  
33  
34  
35  
36  
37  
38  
39  
40  
41  
42  
43  
44  
45  
46  
47  
48  
49  
50  
51  
52  
53  
54  
55  
56  
57  
58  
59  
60



1  
2  
3  
4 **1 ABSTRACT**  
5

6 **2 Introduction** Bone health affects the ability of human body to stay active and the  
7  
8  
9  
10  
11  
12  
13  
14  
15  
16  
17  
18  
19  
20  
21  
22  
23  
24  
25  
26  
27  
28  
29  
30  
31  
32  
33  
34  
35  
36  
37  
38  
39  
40  
41  
42  
43  
44  
45  
46  
47  
48  
49  
50  
51  
52  
53  
54  
55  
56  
57  
58  
59  
60  
degradation of bone health can cause considerable morbidity and mortality. The  
factors related to bone health play an important role in preventing osteoporosis and its  
adverse consequences. However, the risk factors of osteoporosis has not been fully  
elucidated. The deficiency of the trace element selenium may be one of the risk  
factors for the development of osteoporosis. Previous studies have investigated the  
effects of selenium on osteoporosis; however, the results are inconclusive. Therefore,  
the present study aimed to systematically examine the existing literature on the  
associations between dietary or serum selenium and bone mineral density (BMD),  
osteoporosis, or osteoporotic fractures, and to quantify such associations through  
meta-analysis.

13 **Methods and analysis** PubMed, Embase and Cochrane Library will be searched by  
14  
15  
16  
17  
18  
19  
20  
21  
22  
applying the specified search strategy to identify relevant studies up to October 2019.  
Both interventional and observational studies in humans will be included. The  
outcomes will include BMD and the prevalence or incidence of osteoporosis and  
osteoporotic fractures. For the dietary or serum selenium and BMD, osteoporosis, or  
osteoporotic fractures pooled analyses, estimates will be expressed as the mean  
difference, and the pooled odds ratio, relative risk, hazard ratio or beta coefficient and  
corresponding 95% confidence intervals. The heterogeneity of the studies and the  
publication bias will be investigated accordingly. To assess the quality and the risk of  
bias of the included studies, the Newcastle-Ottawa Scale or the Cochrane risk of bias

1  
2  
3  
4 1 assessment tool will be used where appropriate.  
5

6 2 **Ethics and dissemination** Since no private and confidential patient data will be  
7  
8  
9 3 contained in the reporting, approval from an ethics committee is not required. The  
10  
11 4 results will be published in a peer-reviewed journal. The study raises no ethical issues.  
12  
13

14 5 **PROSPERO registration number** CRD42019147188  
15  
16  
17  
18  
19  
20  
21  
22  
23  
24  
25  
26  
27  
28  
29  
30  
31  
32  
33  
34  
35  
36  
37  
38  
39  
40  
41  
42  
43  
44  
45  
46  
47  
48  
49  
50  
51  
52  
53  
54  
55  
56  
57  
58  
59  
60

For peer review only

## 1 **Strengths and limitations of the study**

- 2 ▶ As the first meta-analysis that evaluated the associations between dietary  
3 selenium intake or serum selenium concentrations and BMD, osteoporosis, or  
4 osteoporotic fractures, the findings of this study will deepen the existing  
5 knowledge base on the pathogenesis of osteoporosis, and promote the  
6 development of effective preventive or treatment strategies.
- 7 ▶ Two investigators will perform the study selection, data extraction and quality  
8 assessments independently, and disagreements will be resolved by discussions.
- 9 ▶ Both the quality and the risk of bias will be properly assessed for the included  
10 studies by applying the Newcastle-Ottawa Quality Scale or the Cochrane risk of  
11 bias assessment tool where appropriate.
- 12 ▶ Both prospective and retrospective studies will be included in this meta-analysis,  
13 which may also incur bias and impact the final results. And the differences in  
14 study design and sample characteristics may lead to a high level of heterogeneity.
- 15 ▶ We wish to investigate the associations between selenium and the different types  
16 of primary and secondary osteoporosis, however, such subgroup analysis is  
17 difficult or even impossible given the small number of studies will probably be  
18 included.

19

## 1 INTRODUCTION

2 Bone health affects the ability of the human body to stay active throughout life, and  
3 the degradation of bone health can cause considerable morbidity and mortality.<sup>1 2</sup> The  
4 various factors related to bone health at different ages play an important role in  
5 preventing osteoporosis and its adverse consequences.<sup>3</sup> Bone health is mainly  
6 reflected in diseases caused by bone mass loss, such as osteoporosis and fragility  
7 fracture.<sup>4 5</sup> Osteoporosis, which is characterized by low bone mass and  
8 microarchitectural deterioration of bone tissue, is a systemic skeletal disease that can  
9 result in increased bone fragility and increased fracture risk as a consequence.<sup>3 6</sup> With  
10 an ageing population, the socioeconomic and medical impact of osteoporosis will  
11 increase rapidly. It is estimated that by 2020, there will be over 200 million people  
12 worldwide affected by osteoporosis, and the expenses related to osteoporosis will rise  
13 to about \$25.3 billion by 2025.<sup>7</sup> Osteoporosis is practically diagnosed by the presence  
14 of a fragility fracture or low bone mineral density (BMD) which is a commonly used  
15 proxy measure that accounts for approximately 70% of bone strength.<sup>3</sup> However,  
16 osteoporosis can occur without a known underlying cause, and its risk factors have  
17 not been fully elucidated.

18  
19 Nutrition has a significant influence on bone health and adequate nutrition is  
20 among the crucial cornerstones of the prevention of osteoporosis.<sup>8</sup> The trace element  
21 selenium, as a critical constituent of about 25 selenoenzymes, plays an essential role  
22 in a variety of physiological processes and it has been confirmed that the beneficial

1 effects of selenium are related to human health.<sup>9 10</sup> Some studies collectively  
2 suggested that the preservation of selenoproteins in bone was essential to normal  
3 skeletal development.<sup>11</sup> Animal studies have shown that selenium-deprivation can  
4 retard growth and change bone metabolism.<sup>12</sup> Such effects are associated with  
5 reduced BMD, impaired bone microarchitecture and increased bone resorption.  
6 Previous clinical studies have investigated the effects of selenium on bone health,  
7 however, the results are inconclusive. Some suggested that serum and dietary  
8 selenium were positively correlated with BMD,<sup>13 14</sup> while other showed that neither  
9 serum nor dietary selenium was associated with osteoporosis.<sup>15 16</sup> Meanwhile, some  
10 case-control studies revealed that the dietary intake of selenium was associated with  
11 reduced risk of osteoporotic hip fracture.<sup>17 18</sup>

12  
13 Meta-analysis is an effective tool for revealing trends that may not be apparent,  
14 and it also helps in establishing clinical policies and guidelines. Thus, we aimed to  
15 systematically examine the existing literature in this field to test the hypothesis that  
16 dietary or serum selenium concentrations are associate with BMD, osteoporosis, or  
17 osteoporotic fractures.

## 18 19 **METHODS**

### 20 **Study design**

21 The aim of this meta-analysis is to investigate the associations between dietary intake  
22 or serum levels of selenium and BMD, osteoporosis, or osteoporotic fractures. This

1 protocol was developed according to the Preferred Reporting Items for Systematic  
2 Review and Meta-Analyses Protocols (PRISMA-P) 2015 Statement,<sup>19</sup> and has been  
3 registered in the international prospective register of systematic reviews PROSPERO  
4 network (registration number: CRD42019147188).

## 6 **Eligibility criteria**

### 7 Types of studies

8 The meta-analysis will include both interventional and observational studies in  
9 humans, inclusive of case-control studies, randomized controlled trials, cross-  
10 sectional studies and cohort studies which focus on the associations between dietary  
11 intake or serum levels of selenium and BMD, osteoporosis, or osteoporotic fractures.

### 13 Types of participants

14 The participants in the included studies must have provided information on dietary  
15 intake or serum levels of selenium, and BMD measures or diagnosis of osteoporosis  
16 or osteoporotic fractures. No age, sex, ethnicity, economic status, geographical  
17 limitations, or education restrictions will be applied.

### 19 Types of exposure/intervention

20 Two main forms of exposure will be included, i.e., dietary intake selenium and serum  
21 levels of selenium.

## 1 Types of outcome measures

2 Primary outcomes will include T-score , BMD values and the prevalence or incidence  
3 of osteoporosis. The diagnostic criteria of osteoporosis shall be based on the WHO  
4 criteria.<sup>20</sup> T-score between 0 and -1 is considered normal and T-score  $\leq -2.5$  is  
5 considered osteoporosis. BMD corresponds to osteopenia if T-score ranges between  
6 -1 and -2.5. Osteoporosis is classified as “primary” and “secondary”, and secondary  
7 osteoporosis is due to certain clinical disorders independent of age and estrogen  
8 deficiency.<sup>21</sup> We will catalog and categorize the different types of primary and  
9 secondary osteoporosis according included studies. The secondary outcome will be  
10 the prevalence or incidence of osteoporotic fractures. There will be no restriction on  
11 site and measuring method, but we will give priority to extracting T-score for analysis  
12 rather than to extracting BMD values. When T-score is not available, we will try to  
13 analyze BMD measured with Lunar and Hologic machines separately.

## 15 **Information sources**

16 Systematic literature searches will be undertaken across PubMed, Embase and  
17 Cochrane Library by applying the specified search strategy to identify relevant studies  
18 up to October 2019 on each platform or database. In addition, the references of the  
19 retrieved literature will be manually searched. And Grey literature will also be  
20 searched included study registries (e.g., ClinicalTrials.gov and google scholar). The  
21 relevant studies and systematic reviews will be scanned for additional eligible studies.

22

## 1 **Search strategy**

2 Keyword terms or medical subject heading terms (MESH) will be used to search for  
3 eligible studies in the databases mentioned above. The electronic search strategy is  
4 presented in **Table 1**. All the search terms will be adapted for different syntax rules of  
5 the databases.

## 6 **Study selection**

7 The search results from the three electronic databases will be sent to Endnote. After  
8 removing duplicates, two investigators will be responsible for screening the titles and  
9 abstracts of all the retrieved literature to identify eligible studies. In case that the  
10 eligibility of a study cannot be determined, the full text will be reviewed for inclusion  
11 according to prespecified inclusion and exclusion criteria. There will be no restriction  
12 on the publication date and language. The study selection process will be summarized  
13 based on the PRISMA flow diagram. Disagreements between the two investigators  
14 will be resolved by discussing with a third investigator.

## 15 **Data extraction**

16 Two investigators will be engaged to independently extract the following data in a  
17 standardized collection form: publication information (author, year of publishing);  
18 study information (country of origin, study setting, data sources, study period);  
19 demographic information (sample size, age, and sex distribution); exposure  
20 information (dietary or serum selenium concentrations); outcome information (T-



1 score, BMD values, the prevalence or incidence of osteoporosis or osteoporotic  
2 fractures). Then, both the adjusted and unadjusted effect sizes (mean difference [MD],  
3 odds ratio [OR], relative risk [RR], hazard ratio [HR] or beta coefficient [ $\beta$ ]) will be  
4 either extracted directly or calculated based on the information in the original studies  
5 whenever possible. If the relevant data is not reported in an included study, the  
6 missing information will be obtained by contacting the authors directly as far as  
7 possible. The two investigators responsible for reviewing the literature will resolve  
8 any disagreements through discussions, and a third independent investigator may be  
9 involved into the discussion if required.

### 11 **Assessment of risk of bias**

12 The Cochrane risk of bias assessment tool will be used to assess the quality of  
13 RCTs,<sup>22</sup> while the Newcastle-Ottawa Quality Scale (NOS) will be used to assess the  
14 quality of observational studies.<sup>23</sup> Two investigators will be engaged to conduct the  
15 risk of bias assessment independently, and disagreements will be resolved through  
16 discussions.

### 18 **Data analysis**

19 Firstly, the characteristics of included studies will be summarized using baseline  
20 tables and narrative texts. The proposed study will calculate the MD, the pooled OR,  
21 RR, HR or  $\beta$  and the corresponding 95% CIs. Unadjusted risk estimates and adjusted  
22 estimates will be pooled in the meta-analysis. Then, Cochrane's Q test and the  $I^2$

1  
2  
3  
4 1 statistics will be used to assess the heterogeneity of the included studies, where  $p$   
5  
6 2 value  $> 0.05$  of the Q statistics and  $I^2$  value  $< 50\%$  indicate statistical homogeneity.<sup>24</sup>  
7  
8  
9 3 <sup>25</sup> If the included studies are found to be statistically homogeneous, the fixed effects  
10  
11 4 models will be used to pool the data during meta-analysis; otherwise, the random  
12  
13 5 effects models will be used instead. Statistical analyses will be conducted in Review  
14  
15 6 Manager-5.3 (Copenhagen: The Nordic Cochrane Centre, The Cochrane  
16  
17 7 Collaboration, 2014) and Stata-11.0 (StataCorp LP, College Station, TX) statistical  
18  
19 8 software. Statistical significance is considered at  $p$  value  $< 0.05$ . Finally, to minimize  
20  
21 9 the heterogeneity between included studies, subgroup analyses based on different age,  
22  
23 10 sex, ethnicity, economic status, geographical limitations, education restrictions, or  
24  
25 11 causes of osteoporosis will be conducted where feasible.  
26  
27  
28  
29  
30  
31  
32  
33  
34

### 35 **Assessment of publication bias**

36  
37 14 If the number of included studies is greater than 10, a funnel plot will be constructed  
38  
39 15 and the Egger test will be conducted to observe the publication bias. The existence of  
40  
41 16 publication bias is confirmed when the funnel plot shows an asymmetric pattern.  
42  
43 17 Then, the bias, if any, will be explained through discussions after assessment.  
44  
45  
46  
47  
48  
49

### 50 **Patient and public involvement**

51  
52 20 As our systematic review will be implemented based on published studies, no patients  
53  
54 21 and members of the public will be directly involved. All the data to be used in this  
55  
56 22 study already exists in the published literature and/or the aforementioned sources.  
57  
58  
59  
60

1  
2  
3  
4 1  
56 2 **Ethics and dissemination**  
7  
8

9 3 As this meta-analysis will be performed based on published studies, and no private  
10 4 and confidential patient data will be contained in the reporting, approval from an  
11 5 ethics committee is not required. The results will be disseminated through publication  
12 6 in a peer- reviewed journal. The study raises no ethical issues.  
13  
14  
15  
16  
17  
18  
19

20 7

21 8 **DISCUSSION**  
22  
23

24 9 The health of the skeletal system is important for elderly people.<sup>1</sup> An in-depth  
25 10 understanding of the relationship between selenium and bone health is useful for  
26 11 designing early life interventions. Selenoproteins expressed in human fetal osteoblasts  
27 12 would appear to protect the bone against oxidative stress, which may contribute to the  
28 13 development of osteoporosis by inhibiting osteoblastic differentiation of bone marrow  
29 14 stromal cells.<sup>26 27</sup> The trace element selenium, as a critical constituent of  
30 15 selenoproteins, is much more likely to be an essential role in the associations between  
31 16 selenium and bone mineral density. To our best knowledge, there are at least 10  
32 17 studies that have investigated the associations between dietary or serum selenium  
33 18 concentrations and BMD, osteoporosis, or osteoporotic fractures. Of them, two  
34 19 studies suggested that serum and dietary selenium were likely to positively correlate  
35 20 with BMD,<sup>13 14</sup> and three studies showed that dietary selenium was negatively  
36 21 associated with osteoporotic fractures.<sup>17 18 28</sup> On the contrary, one study found no  
37 22 association between dietary selenium and BMD,<sup>29</sup> and four studies reported that  
38  
39  
40  
41  
42  
43  
44  
45  
46  
47  
48  
49  
50  
51  
52  
53  
54  
55  
56  
57  
58  
59  
60

1  
2  
3  
4 1 neither serum nor dietary selenium was related to osteoporosis.<sup>15 16 30 31</sup> Contradictory  
5  
6 2 results of these studies might be related to the differences in study design and sample  
7  
8  
9 3 characteristics. So it's still controversial whether the contents of selenium can directly  
10  
11 4 influence BMD and affect the pathogenesis of osteoporosis. The sample size of  
12  
13  
14 5 previous studies might have been too small to achieve sufficient statistical power,  
15  
16  
17 6 which could explain, at least in part, why the statistical difference in some instances  
18  
19  
20 7 was not reached, despite the obvious trends. Therefore, the aim of this systematic  
21  
22 8 review and meta-analysis is to summarize the available evidence to investigate the  
23  
24  
25 9 associations between selenium and bone health. The results of this study will deepen  
26  
27  
28 10 the existing knowledge base on the pathogenesis of osteoporosis, and promote the  
29  
30  
31 11 development of preventive or treatment strategies in this field.  
32  
33  
34  
35  
36  
37  
38  
39  
40  
41  
42  
43  
44  
45  
46  
47  
48  
49  
50  
51  
52  
53  
54  
55  
56  
57  
58  
59  
60

1  
2  
3  
4 **1 COMPETING INTERESTS**  
5

6  
7 2 The authors declare that they have no conflict of interest.  
8  
9 3

10  
11  
12 **4 PATIENT CONSENT FOR PUBLICATION**  
13

14 5 Not required.  
15  
16  
17 6

18  
19  
20 **7 FUNDING**  
21

22 8 This work was supported by the National Natural Science Foundation of China  
23  
24 9 (81772413, 81601941, 81702207, 81702206), the National Key Research and  
25  
26  
27 10 Development Program of China (2018YFB1105705), the Scientific Research Project  
28  
29  
30 11 of Science and Technology Office of Hunan Province (2017TP1005), the Key  
31  
32  
33 12 Research and Development Program of Hunan Province (2018SK2070,  
34  
35  
36 13 2017SK2071), the Young Investigator Grant of Xiangya Hospital, Central South  
37  
38  
39 14 University (2016Q03, 2016Q06, 2017Q10), the Xiangya Clinical Big Data System  
40  
41  
42 15 Construction Project of Central South University (45), and the Natural Science  
43  
44  
45 16 Foundation of Hunan Province (2017JJ3491, 2017JJ3492, 2018JJ3825,  
46  
47  
48 17 2019JJ50965).  
49  
50  
51 18

52  
53  
54 **19 AUTHOR'S CONTRIBUTIONS**  
55

56 20 Conceptualization: Yilun Wang and Dongxing Xie  
57

58 21 Data curation: Jing Wu, Ziyang Wu, Hongyi He, Zidan Yang  
59

60 22 Methodology: Jing Wu, Ziyang Wu, Hongyi He, Zidan Yang

1  
2  
3  
4  
5  
6  
7  
8  
9  
10  
11  
12  
13  
14  
15  
16  
17  
18  
19  
20  
21  
22  
23  
24  
25  
26  
27  
28  
29  
30  
31  
32  
33  
34  
35  
36  
37  
38  
39  
40  
41  
42  
43  
44  
45  
46  
47  
48  
49  
50  
51  
52  
53  
54  
55  
56  
57  
58  
59  
60

- 1 Writing – original draft: Ning Wang and Dongxing Xie
- 2 Writing – review & editing: Yilun Wang and Tuo Yang

For peer review only

1  
2  
3  
4 **1 REFERENCES**

- 5  
6 2 1. van den Bergh JP, van Geel TA, Geusens PP. Osteoporosis, frailty and fracture: implications for case  
7 3 finding and therapy. *Nat Rev Rheumatol* 2012;8:163-72.
- 8 4 2. Farhat GN, Cauley JA. The link between osteoporosis and cardiovascular disease. *Clin Cases Miner*  
9 5 *Bone Metab* 2008;5:19-34.
- 10 6 3. NIH Consensus Development Panel on Osteoporosis Prevention, Diagnosis, and Therapy.  
11 7 Osteoporosis prevention, diagnosis, and therapy. *JAMA* 2001;285:785-95.
- 12 8 4. Hampton T. Experts urge early investment in bone health. *JAMA*. 2004;291(7):811-812.
- 13 9 5. Bundred NJ. Optimising bone health in survivors of breast cancer. *Lancet Oncol*. 2007;8(2):89-91.
- 14 10 6. Kanis JA. Assessment of fracture risk and its application to screening for postmenopausal osteoporosis:  
15 11 synopsis of a WHO report. WHO Study Group. *Osteoporos Int* 1994;4:368-81.
- 16 12 7. Burge R, Dawson-Hughes B, Solomon DH, *et al*. Incidence and economic burden of osteoporosis-  
17 13 related fractures in the United States, 2005-2025. *J Bone Miner Res* 2007;22:465-75.
- 18 14 8. Chen LR, Hou PH, Chen KH. Nutritional Support and Physical Modalities for People with  
19 15 Osteoporosis: Current Opinion. *Nutrients* 2019;11:e 2848.
- 20 16 9. Whanger PD. Selenium and its relationship to cancer: an update. *Br J Nutr* 2004;91:11-28.
- 21 17 10. Rayman MP. Selenoproteins and human health: insights from epidemiological data. *Biochim Biophys*  
22 18 *Acta* 2009;1790:1533-40.
- 23 19 11. Zhang Z, Zhang J, Xiao J. Selenoproteins and selenium status in bone physiology and pathology.  
24 20 *Biochim Biophys Acta* 2014;1840:3246-56.
- 25 21 12. Moreno-Reyes R, Egrise D, Neve J, *et al*. Selenium deficiency-induced growth retardation is  
26 22 associated with an impaired bone metabolism and osteopenia. *J Bone Miner Res* 2001;16:1556-63.
- 27 23 13. Beukhof CM, Medici M, van den Beld AW, *et al*. Selenium status is positively associated with bone  
28 24 mineral density in healthy aging European men. *PLoS One* 2016;11:e0152748.
- 29 25 14. Rivas A, Romero A, Mariscal-Arcas M, *et al*. Association between dietary antioxidant quality score  
30 26 (DAQs) and bone mineral density in Spanish women. *Nutr Hosp* 2012;27:1886-93.
- 31 27 15. Arikan DC, Coskun A, Ozer A, *et al*. Plasma selenium, zinc, copper and lipid levels in  
32 28 postmenopausal Turkish women and their relation with osteoporosis. *Biol Trace Elem Res*  
33 29 2011;144:407-17.
- 34 30 16. Ilich JZ, Cvijetic S, Baric IC, *et al*. Nutrition and lifestyle in relation to bone health and body weight  
35 31 in Croatian postmenopausal women. *Int J Food Sci Nutr* 2009;60:319-32.
- 36 32 17. Zhang J, Munger RG, West NA, *et al*. Antioxidant intake and risk of osteoporotic hip fracture in  
37 33 Utah: an effect modified by smoking status. *Am J Epidemiol* 2006;163:9-17.
- 38 34 18. Sun LL, Li BL, Xie HL, *et al*. Associations between the dietary intake of antioxidant nutrients and  
39 35 the risk of hip fracture in elderly Chinese: a case-control study. *Br J Nutr* 2014;112:1706-14.
- 40 36 19. Moher D, Shamseer L, Clarke M, *et al*. Preferred reporting items for systematic review and meta-  
41 37 analysis protocols (PRISMA-P) 2015 statement. *Syst Rev* 2015;4:1.
- 42 38 20. Miller PD. Guidelines for the diagnosis of osteoporosis: T-scores vs fractures. *Rev Endocr Metab*  
43 39 *Disord* 2006;7:75-89.
- 44 40 21. Eastell R, Rosen CJ, Black DM, *et al*. Pharmacological Management of Osteoporosis in  
45 41 Postmenopausal Women: An Endocrine Society Clinical Practice Guideline. *J Clin Endocrinol*  
46 42 *Metab* 2019;104:1595-622.
- 47 43 22. Whiting P, Savovic J, Higgins JP, *et al*. ROBIS: A new tool to assess risk of bias in systematic  
48  
49  
50  
51  
52  
53  
54  
55  
56  
57  
58  
59  
60

- 1 reviews was developed. *J Clin Epidemiol* 2016;69:225-34.
- 2 23. Stang A. Critical evaluation of the Newcastle-Ottawa scale for the assessment of the quality of  
3 nonrandomized studies in meta-analyses. *Eur J Epidemiol* 2010;25:603-5.
- 4 24. Zeng C, Li H, Yang T, *et al.* Effectiveness of continuous and pulsed ultrasound for the management  
5 of knee osteoarthritis: a systematic review and network meta-analysis. *Osteoarthritis Cartilage*  
6 2014;22: 1090–9.
- 7 25. Zeng C, Li H, Yang T, *et al.* Electrical stimulation for pain relief in knee osteoarthritis: systematic  
8 review and network meta-analysis. *Osteoarthritis Cartilage* 2015;23:189–202.
- 9 26. Dreher I, Schütze N, Baur A, *et al.* Selenoproteins are expressed in fetal human osteoblast-like cells.  
10 *Biochem Biophys Res Commun* 1998;245:101–7.
- 11 27. Xu ZS, Wang XY, Xiao DM, *et al.* Hydrogen sulfide protects MC3T3-E1 osteoblastic cells against  
12 H<sub>2</sub>O<sub>2</sub>-induced oxidative damage-implications for the treatment of osteoporosis. *Free Radic Biol Med*  
13 2011;50:1314–23.
- 14 28. Melhus H, Michaelsson K, Holmberg L, *et al.* Smoking, antioxidant vitamins, and the risk of hip  
15 fracture. *J Bone Miner Res* 1999;14:129-35.
- 16 29. Wolf RL, Cauley JA, Pettinger M, *et al.* Lack of a relation between vitamin and mineral antioxidants  
17 and bone mineral density: results from the Women's Health Initiative. *Am J Clin Nutr* 2005;82:581-  
18 8.
- 19 30. Wang L, Yu H, Yang G, *et al.* Correlation between bone mineral density and serum trace element  
20 contents of elderly males in Beijing urban area. *Int J Clin Exp Med* 2015;8:19250-7.
- 21 31. Liu SZ, Yan H, Xu P, *et al.* Correlation analysis between bone mineral density and serum element  
22 contents of postmenopausal women in Xi'an urban area. *Biol Trace Elem Res* 2009;131:205-14.

23



1 **Table 1 Electronic search strategy in Pubmed**

| Number | Search terms                                                                                                                                                                                                                                                                                                                                                                                                                             |
|--------|------------------------------------------------------------------------------------------------------------------------------------------------------------------------------------------------------------------------------------------------------------------------------------------------------------------------------------------------------------------------------------------------------------------------------------------|
| 1      | selenium[mesh] or “selenious acid”[mesh] or selen*[tiab] or selepen[tiab] or organoselen*[tiab] or natriumselen*[tiab] or methylseleninic[tiab] or methylselenium[tiab] or selenomethionin*[tiab] or selenit*[tiab]                                                                                                                                                                                                                      |
| 2      | bone demineralization[mesh] or bone density[mesh] or osteopenia[mesh] or osteoporosis[mesh] or bone densitometry[mesh] or osteoporo*[tiab] or bone densit*[tiab] or bone loss[tiab] or osteomalacia[tiab] or osteodystrophy[tiab] or bone deminerali?ation[tiab] or osteopenia[tiab] or bone mass[tiab] or bone mineral content*[tiab] or bone defect*[tiab] or bone strength[tiab] or BMC[tiab] or “fracture”[mesh] or fracture* [tiab] |
| 3      | 1 AND 2                                                                                                                                                                                                                                                                                                                                                                                                                                  |

2

# Reporting checklist for protocol of a systematic review.

Based on the PRISMA-P guidelines.

## Instructions to authors

Complete this checklist by entering the page numbers from your manuscript where readers will find each of the items listed below.

Your article may not currently address all the items on the checklist. Please modify your text to include the missing information. If you are certain that an item does not apply, please write "n/a" and provide a short explanation.

Upload your completed checklist as an extra file when you submit to a journal.

In your methods section, say that you used the PRISMA-Reporting guidelines, and cite them as:

Moher D, Shamseer L, Clarke M, Ghersi D, Liberati A, Petticrew M, Shekelle P, Stewart LA. Preferred Reporting Items for Systematic Review and Meta-Analysis Protocols (PRISMA-P) 2015 statement. Syst Rev. 2015;4(1):1.

|                |                     |                                                                                    | Page   |
|----------------|---------------------|------------------------------------------------------------------------------------|--------|
|                |                     | Reporting Item                                                                     | Number |
| <b>Title</b>   |                     |                                                                                    |        |
| Identification | <a href="#">#1a</a> | Identify the report as a protocol of a systematic review                           | P1     |
| Update         | <a href="#">#1b</a> | If the protocol is for an update of a previous systematic review, identify as such | n/a    |

1 **Registration**  
2  
3

4 [#2](#) If registered, provide the name of the registry (such as P4, P7-8  
5  
6 PROSPERO) and registration number  
7  
8

9 **Authors**  
10

11  
12  
13 **Contact** [#3a](#) Provide name, institutional affiliation, e-mail address of all P1-2  
14  
15 protocol authors; provide physical mailing address of  
16  
17 corresponding author  
18

19  
20 **Contribution** [#3b](#) Describe contributions of protocol authors and identify the P14-15  
21  
22 guarantor of the review  
23  
24

25 **Amendments**  
26

27  
28  
29 [#4](#) If the protocol represents an amendment of a previously n/a  
30  
31 completed or published protocol, identify as such and list  
32  
33 changes; otherwise, state plan for documenting important  
34  
35 protocol amendments  
36  
37

38 **Support**  
39

40  
41  
42 **Sources** [#5a](#) Indicate sources of financial or other support for the review P14  
43  
44

45 **Sponsor** [#5b](#) Provide name for the review funder and / or sponsor P14  
46  
47

48 **Role of sponsor or** [#5c](#) Describe roles of funder(s), sponsor(s), and / or institution(s), P14  
49  
50 funder  
51 if any, in developing the protocol  
52

53 **Introduction**  
54

55  
56 **Rationale** [#6](#) Describe the rationale for the review in the context of what is P6-7  
57  
58

1 already known

2  
3  
4 Objectives

[#7](#)

5 Provide an explicit statement of the question(s) the review will  
6 address with reference to participants, interventions,  
7 comparators, and outcomes (PICO)

P8-9

10  
11 **Methods**

12  
13  
14 Eligibility criteria

[#8](#)

15 Specify the study characteristics (such as PICO, study design,  
16 setting, time frame) and report characteristics (such as years  
17 considered, language, publication status) to be used as  
18 criteria for eligibility for the review

P8-9

19  
20  
21  
22  
23  
24 Information

[#9](#)

25 Describe all intended information sources (such as electronic  
26 databases, contact with study authors, trial registers or other  
27 grey literature sources) with planned dates of coverage

P9

28  
29  
30  
31  
32 Search strategy

[#10](#)

33 Present draft of search strategy to be used for at least one  
34 electronic database, including planned limits, such that it  
35 could be repeated

P18

36  
37  
38  
39 Study records -

[#11a](#)

40 Describe the mechanism(s) that will be used to manage  
41 records and data throughout the review

P10-11

42 data management

43  
44  
45 Study records -

[#11b](#)

46 State the process that will be used for selecting studies (such  
47 as two independent reviewers) through each phase of the  
48 review (that is, screening, eligibility and inclusion in meta-  
49 analysis)

P9-10

50  
51  
52  
53  
54 Study records -

[#11c](#)

55 Describe planned method of extracting data from reports

P10

56  
57 data collection

(such as piloting forms, done independently, in duplicate), any

|    |                    |                      |                                                                                 |        |
|----|--------------------|----------------------|---------------------------------------------------------------------------------|--------|
| 1  | process            |                      | processes for obtaining and confirming data from investigators                  |        |
| 2  |                    |                      |                                                                                 |        |
| 3  |                    |                      |                                                                                 |        |
| 4  | Data items         | <a href="#">#12</a>  | List and define all variables for which data will be sought                     | P10    |
| 5  |                    |                      | (such as PICO items, funding sources), any pre-planned data                     |        |
| 6  |                    |                      | assumptions and simplifications                                                 |        |
| 7  |                    |                      |                                                                                 |        |
| 8  |                    |                      |                                                                                 |        |
| 9  |                    |                      |                                                                                 |        |
| 10 |                    |                      |                                                                                 |        |
| 11 | Outcomes and       | <a href="#">#13</a>  | List and define all outcomes for which data will be sought,                     | P8     |
| 12 |                    |                      |                                                                                 |        |
| 13 | prioritization     |                      | including prioritization of main and additional outcomes, with                  |        |
| 14 |                    |                      | rationale                                                                       |        |
| 15 |                    |                      |                                                                                 |        |
| 16 |                    |                      |                                                                                 |        |
| 17 |                    |                      |                                                                                 |        |
| 18 |                    |                      |                                                                                 |        |
| 19 | Risk of bias in    | <a href="#">#14</a>  | Describe anticipated methods for assessing risk of bias of                      | P10-11 |
| 20 |                    |                      |                                                                                 |        |
| 21 | individual studies |                      | individual studies, including whether this will be done at the                  |        |
| 22 |                    |                      | outcome or study level, or both; state how this information will                |        |
| 23 |                    |                      | be used in data synthesis                                                       |        |
| 24 |                    |                      |                                                                                 |        |
| 25 |                    |                      |                                                                                 |        |
| 26 |                    |                      |                                                                                 |        |
| 27 |                    |                      |                                                                                 |        |
| 28 |                    |                      |                                                                                 |        |
| 29 | Data synthesis     | <a href="#">#15a</a> | Describe criteria under which study data will be quantitatively                 | P10-11 |
| 30 |                    |                      | synthesised                                                                     |        |
| 31 |                    |                      |                                                                                 |        |
| 32 |                    |                      |                                                                                 |        |
| 33 |                    |                      |                                                                                 |        |
| 34 | Data synthesis     | <a href="#">#15b</a> | If data are appropriate for quantitative synthesis, describe                    | P11    |
| 35 |                    |                      | planned summary measures, methods of handling data and                          |        |
| 36 |                    |                      | methods of combining data from studies, including any                           |        |
| 37 |                    |                      | planned exploration of consistency (such as I <sup>2</sup> , Kendall's $\tau$ ) |        |
| 38 |                    |                      |                                                                                 |        |
| 39 |                    |                      |                                                                                 |        |
| 40 |                    |                      |                                                                                 |        |
| 41 |                    |                      |                                                                                 |        |
| 42 |                    |                      |                                                                                 |        |
| 43 |                    |                      |                                                                                 |        |
| 44 | Data synthesis     | <a href="#">#15c</a> | Describe any proposed additional analyses (such as                              | n/a    |
| 45 |                    |                      | sensitivity or subgroup analyses, meta-regression)                              |        |
| 46 |                    |                      |                                                                                 |        |
| 47 |                    |                      |                                                                                 |        |
| 48 |                    |                      |                                                                                 |        |
| 49 | Data synthesis     | <a href="#">#15d</a> | If quantitative synthesis is not appropriate, describe the type                 | n/a    |
| 50 |                    |                      | of summary planned                                                              |        |
| 51 |                    |                      |                                                                                 |        |
| 52 |                    |                      |                                                                                 |        |
| 53 |                    |                      |                                                                                 |        |
| 54 | Meta-bias(es)      | <a href="#">#16</a>  | Specify any planned assessment of meta-bias(es) (such as                        | P11    |
| 55 |                    |                      | publication bias across studies, selective reporting within                     |        |
| 56 |                    |                      |                                                                                 |        |
| 57 |                    |                      |                                                                                 |        |
| 58 |                    |                      |                                                                                 |        |
| 59 |                    |                      |                                                                                 |        |
| 60 |                    |                      |                                                                                 |        |

studies)

1  
2  
3  
4 Confidence in [#17](#) Describe how the strength of the body of evidence will be n/a  
5  
6 cumulative assessed (such as GRADE)  
7  
8 evidence  
9

10  
11 The PRISMA-P checklist is distributed under the terms of the Creative Commons Attribution License  
12  
13 CC-BY 4.0. This checklist was completed on 20. December 2019 using <https://www.goodreports.org/>,  
14  
15 a tool made by the [EQUATOR Network](#) in collaboration with [Penelope.ai](#)  
16  
17  
18  
19  
20  
21  
22  
23  
24  
25  
26  
27  
28  
29  
30  
31  
32  
33  
34  
35  
36  
37  
38  
39  
40  
41  
42  
43  
44  
45  
46  
47  
48  
49  
50  
51  
52  
53  
54  
55  
56  
57  
58  
59  
60
